# Supplementary material for: Impact of dietary level and ratio of n-6 and n-3 fatty acids on disease progression and mRNA expression of immune and inflammatory markers in Atlantic salmon (Salmo salar) challenged with Paramoeba perurans
Source: PeerJ. 2021 Aug 31;9:e12028. doi: 10.7717/peerj.12028 (PMC8415286; doi:10.7717/peerj.12028)
Supplement: Supplemental Information 2 [file peerj-09-12028-s002.xlsx]

## Sheet: Sheet1
sample id	fish no.	diet	Tank	challenge			SFA	MUFA	18:2 n-6	20:2 n-6	20:3 n-6	20:4 n-6	total n-6	18.3n-3	20:4n-3	20:5n-3 (EPA)	22:5n-3	22:6n-3(DHA)	total n-3	PUFA	n-6/n-3	n-6/n-3
2018-677/22	fisk 31	1	1	non-challenged	LAKS	Gjelle	23.6	36.5	6.6	0.7	1.3	3.1	12.1	1.1	0.4	4.3	1.2	16	23.9	36.1	0.5	0.506276
2018-677/24	fisk 33	1	1	non-challenged	LAKS	Gjelle	24.7	32.4	5.5	0.6	1.4	4.1	12.2	0.8	0.3	5.1	1.1	18.3	26.5	38.6	0.5	0.460377
2018-677/27	fisk 36	1	1	non-challenged	LAKS	Gjelle	25.2	31.2	5.5	0.7	1.6	4.1	12.4	0.8	0.4	4.9	1.4	19.2	27.3	39.7	0.5	0.454212
2018-677/1	fisk 1	2	14	non-challenged	LAKS	Gjelle	23.5	33.3	9.7	1	1.6	3.5	16.2	1.1	0.4	4.2	1.2	15.5	22.9	39.2	0.7	0.707424			Challenged Group					Non-challenged group					Two-way ANOVA P value
2018-677/2	fisk 2	2	14	non-challenged	LAKS	Gjelle	23	34.7	10.6	1	1.6	3.3	16.7	1.2	0.3	4.1	1.2	14.2	21.7	38.5	0.8	0.769585			Diet 1	Diet 2	Diet 6	Diet 1H		Diet 1	Diet 2	Diet 6	Diet 1H	Diet		Challenge	Diet*challenge
2018-677/7	fisk 7	2	14	non-challenged	LAKS	Gjelle	25	29.3	8.8	1	1.7	4.2	16.2	0.8	0.4	4.4	1.2	18.2	25.4	41.6	0.6	0.637795		ΣSFA	24,45±0,32	25,20±0,20	24,75±0,14	25,44±0,29		24,50±0,47	23,83±0,60	23,63±0,44	25,47±0,70	ns		ns	ns
2018-677/15	fisk 21	3	16	non-challenged	LAKS	Gjelle	23.3	22.1	21.5	1.7	1.9	4.8	31	1.1	0.2	2.8	1	16.6	22.1	51.1	1.5	1.40271		ΣMUFA	34,26±1,06	30,64±0,56	20,18±0,43	26,94±0,70		33,37±1,61	32,43±1,62	21,83±0,15	25,63±0,79	<0,0001		ns	ns
2018-677/17	fisk 23	3	16	non-challenged	LAKS	Gjelle	24.5	21.6	20.2	1.7	2.2	4.6	29.8	1	0.3	3.1	0.9	16.8	22.5	50.3	1.5	1.32444		18:2n-6	6,11±0,18	8,68±0,24	18,00±0,68	8,37±0,37		5,87±0,37	9,70±0,52	21,03±0,15	7,57±0,52	<0,0001		0.019	0.0014
2018-677/19	fisk 25	3	16	non-challenged	LAKS	Gjelle	23.1	21.8	21.4	1.9	2	4.6	30.9	1.1	0.2	3	0.9	16.3	21.9	50.8	1.5	1.41096		20:2n-6	0,65±0,02	0,93±0,03	1,94±0,09	0,86±0,02		0,67±,03	1,00±0,00	1,77±0,07	0,77±0,09	<0,0001		ns	ns
2018-677/9	fisk 12	4	15	non-challenged	LAKS	Gjelle	26.4	25	7	0.6	0.9	4.1	13.1	1.4	0.6	5.4	1.4	22.3	31.5	44.5	0.4	0.415873		20:3n-6	1,36±0,06	1,87±0,07	2,20±0,04	0,70±0,02		1,43±0,09	1,63±0,09	2,03±0,09	0,77±0,07	<0,0001		ns	ns
2018-677/10	fisk 13	4	15	non-challenged	LAKS	Gjelle	25.9	24.7	7.1	0.9	0.7	4.4	13.6	1.4	0.5	6.3	1.5	21.2	31.2	44.9	0.4	0.435897		20:4n-6 (ARA)	3,41±0,16	4,28±0,17	5,43±0,23	3,70±0,17		3,77±0,33	3,67±0,27	4,67±0,07	4,10±0,17	0.0002		ns	0.0137
2018-677/13	fisk 16	4	15	non-challenged	LAKS	Gjelle	24.1	27.2	8.6	0.8	0.7	3.8	14.5	2	0.5	6.2	1.5	19	30	44.6	0.5	0.483333		Σn-6	11,88±0,15	16,32±0,14	27,18±0,68	14,16±0,24		12,23±0,09	16,37±0,17	30,57±0,38	13,73±0,41	<0,0001		0.0356	0.005
2018-677/64	fisk 91	1	7	challenged	LAKS	Gjelle	24.4	39.4	7	0.7	1.2	2.7	11.9	1.3	0.4	3.6	1	13.5	20.6	32.5	0.6	0.57767		18:3n-3	0,98±0,06	0,83±0,04	0,83±0,05	1,89±0,13		0,90±0,10	1,03±0,12	1,07±0,03	1,60±0,20	<0,0001		ns	ns
2018-677/65	fisk 92	1	7	challenged	LAKS	Gjelle	25.5	34.8	5.3	0.7	1.4	3.4	11.3	0.8	0.4	4.4	1.5	16.9	24.4			0.463115		20:4n-3	0,36±0,02	0,33±0,02	0,28±0,02	0,51±0,02		0,37±0,03	0,37±0,03	0,23±0,03	0,53±0,03	<0,0001		ns	ns
2018-677/70	fisk 97	1	7	challenged	LAKS	Gjelle	22.6	34.1	5.8	0.6	1.2	3.2	11.2	1	0.4	4.9	1.3	13.4	21.6	32.7	0.5	0.518519		20:5n-3 (EPA)	4,41±0,17	3,85±0,11	3,01±0,11	5,62±0,19		4,77±0,24	4,23±0,09	2,97±0,09	5,97±0,28	<0,0001		ns	ns
2018-677/93	fisk 132	1	1	challenged	LAKS	Gjelle	24.4	32.1	6	0.7	1.4	3.7	12.2	0.9	0.3	4.7	1.3	18.9	26.6	38.9	0.5	0.458647		22:5n-3	1,13±0,06	1,12±0,05	0,95±0,02	1,49±0,05		1,33±0,07	1,20±0,00	0,93±0,03	1,47±0,03	0.0006		ns	ns
2018-677/95	fisk 134	1	1	challenged	LAKS	Gjelle	25.2	30.4	5.3	0.6	1.5	4.1	11.8	0.7	0.3	4.5	0.9	21.3	28.2	40	0.4	0.41844		22:6n-3 (DHA)	16,94±0,96	16,98±0,50	16,48±0,35	18,66±0,56		17,83±0,95	15,97±1,18	14,57±0,15	20,83±0,97	0.0005		ns	ns
2018-677/97	fisk 136	1	1	challenged	LAKS	Gjelle	24.3	35.1	6.3	0.7	1.5	3.3	12.2	1	0.4	4.8	1.3	16.3	24.4	36.6	0.5	0.5		Σn-3	24,40±0,90	23,67±0,36	21,91±0,38	28,96±0,56		25,90±1,03	23,33±1,09	20,17±0,18	30,90±0,46	<0,0001		ns	ns
2018-677/106	fisk 151	1	13	challenged	LAKS	Gjelle	24.4	35.8	6.5	0.7	1.2	3.1	11.7	1.1	0.4	4.5	1.2	16.5	24.4	36.1	0.5	0.479508		ΣPUFA	36,28±1,00	40,02±0,42	50,56±0,50	43,17±0,37		38,13±1,07	39,77±0,94	50,73±0,23	44,67±0,12	<0,0001		ns	ns
2018-677/110	fisk 155	1	13	challenged	LAKS	Gjelle	24.6	36.1	6.1	0.6	1.3	3.3	11.5	1	0.3	3.8	0.9	16.7	23.3	34.8	0.5	0.493562		n-6/n-3	0,50±0,02	0,70±0,00	1,30±0,05	0,49±0,02		0,50±0,00	0,70±0,06	1,50±0,00	0,43±0,03	<0,0001		ns	0.0116
2018-677/111	fisk 156	1	13	challenged	LAKS	Gjelle	25.7	31.1	5.9	0.6	1.6	3.9	12.5	0.8	0.4	4.5	1.1	18.9	26.1	38.6	0.5	0.478927
2018-677/36	fisk 51	2	3	challenged	LAKS	Gjelle	25.5	29.7	8.5	0.9	2	4.7	16.8	0.8	0.3	4	1.3	16.6	23.5	40.2	0.7	0.714894
2018-677/38	fisk 53	2	3	challenged	LAKS	Gjelle	24.3	33	9.7	1	1.6	3.6	16.5	1	0.4	4.1	1.2	15.5	22.9	39.4	0.7	0.720524
2018-677/39	fisk 54	2	3	challenged	LAKS	Gjelle	25.5	32.1	8.6	0.8	1.8	4.3	15.9	0.9	0.4	3.7	1.1	16.3	22.9	38.8	0.7	0.694323
2018-677/53	fisk 74	2	5	challenged	LAKS	Gjelle	24.7	32.1	8.6	0.9	1.9	4.4	16.4	0.8	0.3	3.8	1.1	17.6	23.7	40.1	0.7	0.691983
2018-677/54	fisk 75	2	5	challenged	LAKS	Gjelle	25.7	29.1	8.4	0.9	2.1	4.3	16.1	0.9	0.4	3.9	1.2	17.2	23.3	39.4	0.7	0.690987
2018-677/55	fisk 76	2	5	challenged	LAKS	Gjelle	24.8	31.2	9.6	1	1.5	4	16.6	1	0.4	4.7	1.3	15.9	23.8	40.4	0.7	0.697479
2018-677/80	fisk 113	2	14	challenged	LAKS	Gjelle	25.2	29.8	8.8	1	1.8	4	16.1	0.8	0.3	4	1.1	16.6	23.5	39.7	0.7	0.685106
2018-677/81	fisk 114	2	14	challenged	LAKS	Gjelle	25.6	29.4	7.9	0.9	2.1	4.7	16.1	0.7	0.3	3.4	0.9	18.2	23.9	40.2	0.7	0.67364
2018-677/82	fisk 115	2	14	challenged	LAKS	Gjelle	25.1	29.3	8.6	1	1.9	4.4	16.5	0.8	0.3	3.9	1.1	18.7	25.3	41.8	0.7	0.652174
2018-677/44	fisk 62	3	4	challenged	LAKS	Gjelle	24.4	20.1	18.6	2.1	2.2	4.7	28.6	0.9	0.3	3.2	1	15.5	21.1	50.7	1.4	1.35545
2018-677/46	fisk 64	3	4	challenged	LAKS	Gjelle	24.2	19.4	18.4	2.2	2.1	5.4	29	0.8	0.3	3.3	1	17.6	23.5	52.5	1.2	1.23404
2018-677/47	fisk 65	3	4	challenged	LAKS	Gjelle	24.6	18.7	17.6	1.9	2.1	6	28.7	0.6	0.3	3.3	0.9	17	22.5	48.2	1.1	1.27556
2018-677/73	fisk 103	3	8	challenged	LAKS	Gjelle	25.2	22.8	16.8	1.5	2.2	5.2	26.9	0.9	0.3	2.5	1	16.8	21.9	48.9	1.2	1.22831
2018-677/76	fisk 106	3	8	challenged	LAKS	Gjelle	24.6	20.4	18.4	2	2.1	5.4	29	0.9	0.2	2.7	0.9	16.6	21.7	51.7	1.4	1.33641
2018-677/77	fisk 107	3	8	challenged	LAKS	Gjelle	25.1	19.9	17.8	1.9	2.3	5.8	28.9	0.8	0.3	3.2	1	16.7	22.3	51.2	1.3	1.29596
2018-677/88	fisk 124	3	10	challenged	LAKS	Gjelle	25.3	19.5	16.8	1.7	2.4	6.4	28.5	0.7	0.2	3.1	0.9	17.1	22.4	50.9	1.3	1.27232
2018-677/89	fisk 125	3	10	challenged	LAKS	Gjelle	25.3	20.1	17.8	1.8	1.9	5.4	28.5	0.8	0.3	3	1.2	16.5	22.1	50.6	1.3	1.28959
2018-677/91	fisk 127	3	10	challenged	LAKS	Gjelle	24.6	20.6	18.6	2.2	2.2	4.5	28.5	1	0.3	2.8	0.9	14.5	19.9	50.4	1.5	1.43216
2018-677/29	fisk 41	4	2	challenged	LAKS	Gjelle	24	30.1	10.3	0.9	0.6	3	15.4	2.6	0.6	5.3	1.4	15.6	26.6	42.2	0.6	0.578947
2018-677/32	fisk 44	4	2	challenged	LAKS	Gjelle	24.6	28.1	9	0.8	0.7	3.8	14.7	2.1	0.5	5.8	1.5	17.8	28.5	43.2	0.5	0.515789
2018-677/34	fisk 46	4	2	challenged	LAKS	Gjelle	25.8	25.9	8.1	0.9	0.6	3.6	13.7	1.8	0.5	6.1	1.7	19.4	30.3	44	0.5	0.452145
2018-677/57	fisk 81	4	6	challenged	LAKS	Gjelle	26.2	25.4	7.4	0.9	0.8	4.4	14	1.5	0.5	6.2	1.6	19.5	29.9	43.9	0.5	0.468227
2018-677/59	fisk 83	4	6	challenged	LAKS	Gjelle	25.5	28.7	8.8	0.9	0.7	3.1	14.1	2	0.6	4.6	1.2	17.6	26.9	41.1	0.5	0.524164
2018-677/63	fisk 87	4	6	challenged	LAKS	Gjelle	25.2	27.9	8.6	0.8	0.7	3.6	14.2	2	0.5	5.2	1.3	18.9	28.7	43	0.5	0.494774
2018-677/99	fisk 141	4	12	challenged	LAKS	Gjelle	26.6	24.7	7	0.9	0.7	3.9	13	1.5	0.4	5.9	1.6	20.8	31	43.9	0.4	0.419355
2018-677/101	fisk 143	4	12	challenged	LAKS	Gjelle	26.3	23.7	7	0.8	0.7	4.5	13.6	1.4	0.5	6.3	1.6	20.7	31	44.7	0.4	0.43871
2018-677/105	fisk 147	4	12	challenged	LAKS	Gjelle	24.8	28	9.1	0.8	0.8	3.4	14.7	2.1	0.5	5.2	1.5	17.6	27.7	42.5	0.5	0.530686
