# Supplementary material for: Impact of dietary level and ratio of n-6 and n-3 fatty acids on disease progression and mRNA expression of immune and inflammatory markers in Atlantic salmon (Salmo salar) challenged with Paramoeba perurans
Source: PeerJ. 2021 Aug 31;9:e12028. doi: 10.7717/peerj.12028 (PMC8415286; doi:10.7717/peerj.12028)
Supplement: Supplemental Information 3 [file peerj-09-12028-s003.xlsx]

## Sheet: Growth
Date	Fish	sample ID	Tank	Diet	Sampling	Mass	Length
2018-04-16	1	81	7	1	1	302	27
2018-04-16	2	82	7	1	1	388	31
2018-04-16	3	83	7	1	1	283	27.5
2018-04-16	4	84	7	1	1	347	28.5
2018-04-16	5	85	7	1	1	293	26.5
2018-04-16	6	86	7	1	1	348	29
2018-04-16	7	87	7	1	1	342	29
2018-04-16	8	88	7	1	1	333	28
2018-04-16	1	113	11	1	1	328	28.5
2018-04-16	2	114	11	1	1	372	29
2018-04-16	3	115	11	1	1	376	30
2018-04-16	4	116	11	1	1	303	27
2018-04-16	5	117	11	1	1	325	28
2018-04-16	6	118	11	1	1	395	31
2018-04-16	7	119	11	1	1	418	30.5
2018-04-16	8	120	11	1	1	323	28
2018-04-16	1	33	13	1	1	308	28
2018-04-16	2	34	13	1	1	279	28
2018-04-16	3	35	13	1	1	278	26.5
2018-04-16	4	36	13	1	1	322	28.5
2018-04-16	5	37	13	1	1	428	31
2018-04-16	6	38	13	1	1	284	27.5
2018-04-16	7	39	13	1	1	300	28
2018-04-16	8	40	13	1	1	340	30
2018-04-16	1	49	3	2	1	302	28
2018-04-16	2	50	3	2	1	295	26.5
2018-04-16	3	51	3	2	1	462	32
2018-04-16	4	52	3	2	1	380	29
2018-04-16	5	53	3	2	1	385	30
2018-04-16	6	54	3	2	1	309	27.5
2018-04-16	7	55	3	2	1	407	31
2018-04-16	8	56	3	2	1	283	27.5
2018-04-16	1	65	5	2	1	320	28
2018-04-16	2	66	5	2	1	279	28.5
2018-04-16	3	67	5	2	1	275	27.5
2018-04-16	4	68	5	2	1	266	26.5
2018-04-16	5	69	5	2	1	410	31
2018-04-16	6	70	5	2	1	346	28
2018-04-16	7	71	5	2	1	415	31.5
2018-04-16	8	72	5	2	1	281	27.5
2018-04-16	1	97	9	2	1	359	29
2018-04-16	2	98	9	2	1	299	27.5
2018-04-16	3	99	9	2	1	432	31
2018-04-16	4	100	9	2	1	377	29
2018-04-16	5	101	9	2	1	350	29
2018-04-16	6	102	9	2	1	302	27
2018-04-16	7	103	9	2	1	363	31
2018-04-16	8	104	9	2	1	272	26.5
2018-04-16	1	57	4	3	1	388	30
2018-04-16	2	58	4	3	1	288	28
2018-04-16	3	59	4	3	1	319	27
2018-04-16	4	60	4	3	1	310	28.5
2018-04-16	5	61	4	3	1	287	26.5
2018-04-16	6	62	4	3	1	311	28
2018-04-16	7	63	4	3	1	285	26.5
2018-04-16	8	64	4	3	1	314	28
2018-04-16	1	89	8	3	1	424	30.5
2018-04-16	2	90	8	3	1	305	29
2018-04-16	3	91	8	3	1	261	26.5
2018-04-16	4	92	8	3	1	319	28
2018-04-16	5	93	8	3	1	381	28
2018-04-16	6	94	8	3	1	314	27.5
2018-04-16	7	95	8	3	1	417	30
2018-04-16	8	96	8	3	1	336	28.5
2018-04-16	1	105	10	3	1	346	29
2018-04-16	2	106	10	3	1	342	29
2018-04-16	3	107	10	3	1	326	29
2018-04-16	4	108	10	3	1	287	27
2018-04-16	5	109	10	3	1	253	26
2018-04-16	6	110	10	3	1	244	27
2018-04-16	7	111	10	3	1	341	29
2018-04-16	8	112	10	3	1	237	25.5
2018-04-16	1	121	2	4	1	295	27.5
2018-04-16	2	122	2	4	1	445	32
2018-04-16	3	123	2	4	1	341	29
2018-04-16	4	124	2	4	1	292	27.5
2018-04-16	5	125	2	4	1	389	30
2018-04-16	6	126	2	4	1	361	30
2018-04-16	7	127	2	4	1	365	29
2018-04-16	8	128	2	4	1	346	30
2018-04-16	1	73	6	4	1	333	29
2018-04-16	2	74	6	4	1	384	31
2018-04-16	3	75	6	4	1	343	30.5
2018-04-16	4	76	6	4	1	441	32
2018-04-16	5	77	6	4	1	372	29
2018-04-16	6	78	6	4	1	402	31
2018-04-16	7	79	6	4	1	331	29
2018-04-16	8	80	6	4	1	308	28
2018-04-16	1	41	12	4	1	380	29
2018-04-16	2	42	12	4	1	251	26.5
2018-04-16	3	43	12	4	1	348	29.5
2018-04-16	4	44	12	4	1	311	28.5
2018-04-16	5	45	12	4	1	276	27.5
2018-04-16	6	46	12	4	1	348	29
2018-04-16	7	47	12	4	1	339	29.5
2018-04-16	8	48	12	4	1	378	30
		219	7	1	2	353	28.5
		220	7	1	2	484	31
		221	7	1	2	486	31.5
		222	7	1	2	310	27.5
		223	7	1	2	285	27
		224	7	1	2	342	29
		225	7	1	2	317	27
		226	7	1	2	285	27.5
		227	7	1	2	341	29
		228	7	1	2	442	32
		259	11	1	2	291	27.5
		260	11	1	2	416	30.5
		261	11	1	2	334	29.5
		262	11	1	2	292	28
		263	11	1	2	257	26
		264	11	1	2	405	30.5
		265	11	1	2	348	29.5
		266	11	1	2	315	29
		267	11	1	2	346	28.5
		268	11	1	2	395	30
		279	13	1	2	334	28
		280	13	1	2	507	32
		281	13	1	2	442	30.5
		282	13	1	2	360	30
		283	13	1	2	356	30
		284	13	1	2	340	28.5
		285	13	1	2	341	29
		286	13	1	2	440	30.5
		287	13	1	2	358	28.5
		288	13	1	2	343	28.5
		179	3	2	2	331	29
		180	3	2	2	365	29
		181	3	2	2	414	30
		182	3	2	2	346	28.5
		183	3	2	2	333	29.5
		184	3	2	2	443	30.5
		185	3	2	2	436	30
		186	3	2	2	342	28
		187	3	2	2	460	32
		188	3	2	2	271	26.5
		199	5	2	2	424	31.5
		200	5	2	2	444	32.5
		201	5	2	2	444	31.5
		202	5	2	2	445	31
		203	5	2	2	313	27.5
		204	5	2	2	403	31.5
		205	5	2	2	345	30
		206	5	2	2	305	28
		207	5	2	2	335	29.5
		208	5	2	2	279	26.5
		239	9	2	2	359	30
		240	9	2	2	338	28
		241	9	2	2	398	30
		242	9	2	2	285	27
		243	9	2	2	334	29.5
		244	9	2	2	394	29
		245	9	2	2	303	27
		246	9	2	2	363	29
		247	9	2	2	141	30.5
		248	9	2	2	364	27.5
		189	4	3	2	318	27
		190	4	3	2	398	30
		191	4	3	2	391	29.5
		192	4	3	2	309	28.5
		193	4	3	2	371	29
		194	4	3	2	393	30
		195	4	3	2	440	31
		196	4	3	2	316	28.5
		197	4	3	2	308	28
		198	4	3	2	377	30
		229	8	3	2	339	28
		230	8	3	2	385	29
		231	8	3	2	385	30
		232	8	3	2	336	28
		233	8	3	2	243	27
		234	8	3	2	423	31.5
		235	8	3	2	293	26.5
		236	8	3	2	341	29
		237	8	3	2	382	30
		238	8	3	2	361	28.5
		249	10	3	2	360	30
		250	10	3	2	397	30
		251	10	3	2	429	31
		252	10	3	2	337	28.5
		253	10	3	2	350	29
		254	10	3	2	412	31
		255	10	3	2	380	30
		256	10	3	2	380	30
		257	10	3	2	323	27
		258	10	3	2	411	30
		169	2	4	2	396	30.5
		170	2	4	2	362	28.5
		171	2	4	2	358	29
		172	2	4	2	427	31.5
		173	2	4	2	388	30.5
		174	2	4	2	344	29
		175	2	4	2	456	31.5
		176	2	4	2	337	29
		177	2	4	2	316	27.5
		178	2	4	2	393	29
		209	6	4	2	345	29.5
		210	6	4	2	321	28.5
		211	6	4	2	317	27
		212	6	4	2	473	32.5
		213	6	4	2	387	30
		214	6	4	2	345	28.5
		215	6	4	2	358	29
		216	6	4	2	401	31
		217	6	4	2	419	31.5
		218	6	4	2	346	29
		269	12	4	2	347	29
		270	12	4	2	401	31
		271	12	4	2	371	29.5
		272	12	4	2	352	29
		273	12	4	2	378	29
		274	12	4	2	456	32
		275	12	4	2	437	32
		276	12	4	2	476	32
		277	12	4	2	364	30.5
		278	12	4	2	342	29.5
		379	7	1	3	356	29
		380	7	1	3	413	30.5
		381	7	1	3	381	30
		382	7	1	3	462	32
		383	7	1	3	329	27.5
		384	7	1	3	280	26
		385	7	1	3	408	30
		386	7	1	3	490	33
		387	7	1	3	428	30.5
		388	7	1	3	482	31.5
		419	11	1	3	377	29
		420	11	1	3	428	31
		421	11	1	3	550	32.5
		422	11	1	3	383	29.5
		423	11	1	3	525	33.5
		424	11	1	3	368	29.5
		425	11	1	3	512	33
		426	11	1	3	505	31.5
		427	11	1	3	396	31
		428	11	1	3	374	29
		439	13	1	3	433	31
		440	13	1	3	373	28
		441	13	1	3	393	30
		442	13	1	3	436	31
		443	13	1	3	286	26
		444	13	1	3	370	29
		445	13	1	3	439	32
		446	13	1	3	458	31
		447	13	1	3	366	29
		448	13	1	3	418	31
		339	3	2	3	357	29.5
		340	3	2	3	464	31.5
		341	3	2	3	469	31
		342	3	2	3	500	33
		343	3	2	3	445	31.5
		344	3	2	3	294	28
		345	3	2	3	415	31
		346	3	2	3	325	28
		347	3	2	3	369	29
		348	3	2	3	431	30.5
		359	5	2	3	415	29.5
		360	5	2	3	447	31
		361	5	2	3	384	29
		362	5	2	3	407	31
		363	5	2	3	4017	30.5
		364	5	2	3	493	33
		365	5	2	3	433	30.5
		366	5	2	3	354	29
		367	5	2	3	433	30.5
		368	5	2	3	370	28.5
		399	9	2	3	420	30.5
		400	9	2	3	393	30
		401	9	2	3	270	27
		402	9	2	3	327	28
		403	9	2	3	456	31
		404	9	2	3	544	33
		405	9	2	3	475	31
		406	9	2	3	363	28.5
		407	9	2	3	381	30
		408	9	2	3	299	27.5
		539	7	1	4	513	32.5
		540	7	1	4	445	30.5
		541	7	1	4	549	33
		542	7	1	4	415	30
		543	7	1	4	369	30
		544	7	1	4	394	29
		545	7	1	4	384	29.5
		546	7	1	4	352	28
		547	7	1	4	324	28
		548	7	1	4	365	26
		579	11	1	4	371	30
		580	11	1	4	472	31.5
		581	11	1	4	460	32
		582	11	1	4	336	28.5
		583	11	1	4	410	30
		584	11	1	4	428	34
		585	11	1	4	374	29.5
		586	11	1	4	501	33
		587	11	1	4	515	32.5
		588	11	1	4	358	29.5
		599	13	1	4	380	30
		600	13	1	4	335	28
		601	13	1	4	397	29.5
		602	13	1	4	360	29
		603	13	1	4	330	27.5
		604	13	1	4	383	29.5
		605	13	1	4	536	33
		606	13	1	4	460	31.5
		607	13	1	4	471	31
		608	13	1	4	462	31.5
		499	3	2	4	443	30.5
		500	3	2	4	426	31.5
		501	3	2	4	370	28
		502	3	2	4	400	30.5
		503	3	2	4	377	29
		504	3	2	4	509	33
		505	3	2	4	419	30.5
		506	3	2	4	389	29.5
		507	3	2	4	378	30
		508	3	2	4	459	31
		519	5	2	4	476	33
		520	5	2	4	458	30
		521	5	2	4	486	32.5
		522	5	2	4	435	30
		523	5	2	4	359	28.5
		524	5	2	4	455	32.5
		525	5	2	4	397	30.5
		526	5	2	4	352	29.5
		527	5	2	4	460	32.5
		528	5	2	4	323	28
		559	9	2	4	357	28.5
		560	9	2	4	367	29
		561	9	2	4	371	29.5
		562	9	2	4	355	28.5
		563	9	2	4	449	30.5
		564	9	2	4	447	31.5
		565	9	2	4	565	34
		566	9	2	4	317	27.5
		567	9	2	4	448	32
		568	9	2	4	422	31
		509	4	3	4	419	32
		510	4	3	4	384	30.5
		511	4	3	4	442	31.5
		512	4	3	4	434	31.5
		513	4	3	4	364	30
		514	4	3	4	365	30
		515	4	3	4	361	30
		516	4	3	4	319	27
		517	4	3	4	344	28
		518	4	3	4	426	30.5
		549	8	3	4	316	28
		550	8	3	4	342	31
		551	8	3	4	306	29
		552	8	3	4	407	31
		553	8	3	4	324	28
		554	8	3	4	392	31
		555	8	3	4	352	29
		556	8	3	4	298	27.5
		557	8	3	4	357	29
		558	8	3	4	300	28
		569	10	3	4	391	29.5
		570	10	3	4	275	28
		571	10	3	4	356	29
		572	10	3	4	318	29
		573	10	3	4	386	30
		574	10	3	4	494	32.5
		575	10	3	4	360	30
		576	10	3	4	514	33
		577	10	3	4	421	31
		578	10	3	4	328	27.5
		489	2	4	4	416	30.5
		490	2	4	4	409	30
		491	2	4	4	531	32.5
		492	2	4	4	502	32.5
		493	2	4	4	426	31
		494	2	4	4	378	30.5
		495	2	4	4	480	32.5
		496	2	4	4	433	32
		497	2	4	4	467	32.5
		498	2	4	4	368	28.5
		529	6	4	4	471	32.5
		530	6	4	4	383	29
		531	6	4	4	359	29
		532	6	4	4	487	32
		533	6	4	4	433	31
		534	6	4	4	390	30
		535	6	4	4	453	31
		536	6	4	4	400	30
		537	6	4	4	365	30.5
		538	6	4	4	367	29.5
		589	12	4	4	431	30.5
		590	12	4	4	380	30.5
		591	12	4	4	449	32
		592	12	4	4	450	32
		593	12	4	4	555	34
		594	12	4	4	445	31
		595	12	4	4	369	29
		596	12	4	4	468	32
		597	12	4	4	435	30
		598	12	4	4	487	32
		699	7	1	5	493	32.5
		700	7	1	5	395	31
		701	7	1	5	328	29.5
		702	7	1	5	427	30.5
		703	7	1	5	530	32.5
		704	7	1	5	474	31.5
		705	7	1	5	588	33.5
		727	11	1	5	540	33.5
		728	11	1	5	402	31
		729	11	1	5	473	31.5
		730	11	1	5	505	32
		731	11	1	5	446	31
		732	11	1	5	493	31.5
		733	11	1	5	591	33.5
		741	13	1	5	397	30
		742	13	1	5	444	31.5
		743	13	1	5	458	32
		744	13	1	5	363	29.5
		745	13	1	5	476	31.5
		746	13	1	5	563	33
		747	13	1	5	488	32
		671	3	2	5	394	30
		672	3	2	5	375	29.5
		673	3	2	5	501	32.5
		674	3	2	5	499	32.5
		675	3	2	5	479	32
		676	3	2	5	303	28
		677	3	2	5	434	30
		685	5	2	5	343	28.5
		686	5	2	5	599	33.5
		687	5	2	5	453	31.5
		688	5	2	5	480	31.5
		689	5	2	5	512	33.5
		690	5	2	5	491	33.5
		691	5	2	5	436	32
		713	9	2	5	537	33
		714	9	2	5	349	29
		715	9	2	5	244	25.5
		716	9	2	5	352	31
		717	9	2	5	434	31
		718	9	2	5	401	30
		719	9	2	5	280	27.5
		679	4	3	5	376	30
		680	4	3	5	425	31
		681	4	3	5	430	31.5
		682	4	3	5	472	32
		683	4	3	5	423	30
		684	4	3	5	399	31
		706	8	3	5	386	30
		707	8	3	5	380	30
		708	8	3	5	488	32
		709	8	3	5	361	29.5
		710	8	3	5	426	31.5
		711	8	3	5	365	29.5
		712	8	3	5	278	28.5
		720	10	3	5	474	33
		721	10	3	5	486	32.5
		722	10	3	5	329	28
		723	10	3	5	458	31
		724	10	3	5	543	34.5
		725	10	3	5	503	33
		726	10	3	5	304	27
		664	2	4	5	398	29.5
		665	2	4	5	360	29.5
		666	2	4	5	387	31
		667	2	4	5	386	29.5
		668	2	4	5	504	33
		669	2	4	5	544	33
		670	2	4	5	441	31
		692	6	4	5	535	34.5
		693	6	4	5	595	34
		64	6	4	5	452	31.5
		695	6	4	5	419	30.5
		696	6	4	5	368	31
		697	6	4	5	482	31.5
		698	6	4	5	417	32
		734	12	4	5	481	32
		735	12	4	5	680	36
		736	12	4	5	467	33
		737	12	4	5	386	31
		738	12	4	5	431	31.5
		739	12	4	5	484	32
		740	12	4	5	442	31
		748	1	1	6	573	33
		749	1	1	6	429	30
		750	1	1	6	551	33
		751	1	1	6	381	29.5
		752	1	1	6	503	32
		753	1	1	6	350	28.5
		754	1	1	6	497	32
		755	1	1	6	430	31
		756	1	1	6	386	28.5
		757	1	1	6	435	31
		812	7	1	6	410	30.5
		813	7	1	6	566	34
		814	7	1	6	520	33
		815	7	1	6	400	31
		816	7	1	6	553	33.5
		817	7	1	6	483	33
		818	7	1	6	603	34
		819	7	1	6	384	30.5
		820	7	1	6	525	33
		821	7	1	6	401	30.5
		770	3	2	6	463	31.5
		771	3	2	6	408	31
		772	3	2	6	404	31.5
		773	3	2	6	402	29.5
		774	3	2	6	518	33
		775	3	2	6	444	31
		776	3	2	6	531	33.5
		777	3	2	6	445	31
		778	3	2	6	541	33.5
		779	3	2	6
		790	5	2	6	606	35.5
		791	5	2	6	590	35
		792	5	2	6	425	30
		793	5	2	6	531	32.5
		794	5	2	6	397	30.5
		795	5	2	6	577	34.5
		796	5	2	6	464	31.5
		797	5	2	6	556	34
		798	5	2	6	436	30.5
		799	5	2	6	451	31.5
		780	4	3	6	531	29
		781	4	3	6	432	31.5
		782	4	3	6	525	32.5
		783	4	3	6	424	30.5
		784	4	3	6	409	29.5
		785	4	3	6	305	27
		786	4	3	6	395	29
		787	4	3	6	387	29
		788	4	3	6	357	29.5
		789	4	3	6	396	30.5
		823	8	3	6	382	29.5
		824	8	3	6	466	32
		825	8	3	6	235	28
		826	8	3	6	241	26
		827	8	3	6	316	29
		828	8	3	6	468	32
		829	8	3	6	369	30
		830	8	3	6	379	30.5
		831	8	3	6	361	30
		758	2	4	6	508	33.5
		759	2	4	6	514	31.5
		760	2	4	6	409	31.5
		761	2	4	6	374	29
		762	2	4	6	241	26.5
		763	2	4	6	523	33.5
		764	2	4	6	425	31
		765	2	4	6	476	31.5
		766	2	4	6	467	33
		767	2	4	6	564	33.5
		801	6	4	6	503	33.5
		802	6	4	6	522	33.5
		803	6	4	6	491	33.5
		804	6	4	6	438	31.5
		805	6	4	6	499	33
		806	6	4	6	397	31
		807	6	4	6	543	34
		808	6	4	6	431	31.5
		809	6	4	6	398	30.5
		810	6	4	6	373	30.5

## Sheet: week 0
Date	Fish	sample ID	Tank	Diet	Mass	Length	Sampling	Overall gill score	total score	Gills Affected	Severity	Healthy Gills	Average	St Dev	Median	Overall gill score	total score	Gills Affected	Severity	Healthy Gills
2018-04-16	1	81	7	1	302	27	1	0	0	0	0	16	0	0	0	0.125	0.125	0.125	0.125	15.875
2018-04-16	2	82	7	1	388	31	1	0	0	0	0	16	0	0	0	0	0	0	0	16
2018-04-16	3	83	7	1	283	27.5	1	0	0	0	0	16	0	0	0	0	0	0	0	16
2018-04-16	4	84	7	1	347	28.5	1	0	0	0	0	16	0	0	0	0.0416667
2018-04-16	5	85	7	1	293	26.5	1	1	1	1	1	15	0.0625	0.25	0
2018-04-16	6	86	7	1	348	29	1	0	0	0	0	16	0	0	0
2018-04-16	7	87	7	1	342	29	1	0	0	0	0	16	0	0	0
2018-04-16	8	88	7	1	333	28	1	0	0	0	0	16	0	0	0
2018-04-16	1	113	11	1	328	28.5	1	0	0	0	0	16	0	0	0
2018-04-16	2	114	11	1	372	29	1	0	0	0	0	16	0	0	0
2018-04-16	3	115	11	1	376	30	1	0	0	0	0	16	0	0	0
2018-04-16	4	116	11	1	303	27	1	0	0	0	0	16	0	0	0
2018-04-16	5	117	11	1	325	28	1	0	0	0	0	16	0	0	0
2018-04-16	6	118	11	1	395	31	1	0	0	0	0	16	0	0	0
2018-04-16	7	119	11	1	418	30.5	1	0	0	0	0	16	0	0	0
2018-04-16	8	120	11	1	323	28	1	0	0	0	0	16	0	0	0
2018-04-16	1	33	13	1	308	28	1	0	0	0	0	16	0	0	0
2018-04-16	2	34	13	1	279	28	1	0	0	0	0	16	0	0	0
2018-04-16	3	35	13	1	278	26.5	1	0	0	0	0	16	0	0	0
2018-04-16	4	36	13	1	322	28.5	1	0	0	0	0	16	0	0	0
2018-04-16	5	37	13	1	428	31	1	0	0	0	0	16	0	0	0
2018-04-16	6	38	13	1	284	27.5	1	0	0	0	0	16	0	0	0
2018-04-16	7	39	13	1	300	28	1	0	0	0	0	16	0	0	0
2018-04-16	8	40	13	1	340	30	1	0	0	0	0	16	0	0	0
2018-04-16	1	49	3	2	302	28	1	0	0	0	0	16	0	0	0	0.125	0.25	0.25	0.5	15.75
2018-04-16	2	50	3	2	295	26.5	1	0	0	0	0	16	0	0	0	0.25	0.5	0.5	1.25	15.5
2018-04-16	3	51	3	2	462	32	1	0	0	0	0	16	0	0	0	0.25	0.25	0.25	0.25	15.75
2018-04-16	4	52	3	2	380	29	1	0	0	0	0	16	0	0	0
2018-04-16	5	53	3	2	385	30	1	0	0	0	0	16	0	0	0
2018-04-16	6	54	3	2	309	27.5	1	0	0	0	0	16	0	0	0
2018-04-16	7	55	3	2	407	31	1	1	2	2	4	14	0.125	0.341565	0
2018-04-16	8	56	3	2	283	27.5	1	0	0	0	0	16	0	0	0
2018-04-16	1	65	5	2	320	28	1	0	0	0	0	16	0	0	0
2018-04-16	2	66	5	2	279	28.5	1	0	0	0	0	16	0	0	0
2018-04-16	3	67	5	2	275	27.5	1	0	0	0	0	16	0	0	0
2018-04-16	4	68	5	2	266	26.5	1	0	0	0	0	16	0	0	0
2018-04-16	5	69	5	2	410	31	1	0	0	0	0	16	0	0	0
2018-04-16	6	70	5	2	346	28	1	0	0	0	0	16	0	0	0
2018-04-16	7	71	5	2	415	31.5	1	1	3	3	9	13	0.0625	0.25	0
2018-04-16	8	72	5	2	281	27.5	1	1	1	1	1	15	0	0	0
2018-04-16	1	97	9	2	359	29	1	0	0	0	0	16	0	0	0
2018-04-16	2	98	9	2	299	27.5	1	0	0	0	0	16	0	0	0
2018-04-16	3	99	9	2	432	31	1	0	0	0	0	16	0	0	0
2018-04-16	4	100	9	2	377	29	1	1	1	1	1	15	0.0625	0.25	0
2018-04-16	5	101	9	2	350	29	1	0	0	0	0	16	0	0	0
2018-04-16	6	102	9	2	302	27	1	0	0	0	0	16	0	0	0
2018-04-16	7	103	9	2	363	31	1	0	0	0	0	16	0	0	0
2018-04-16	8	104	9	2	272	26.5	1	1	1	1	1	15	0.0625	0.25	0
2018-04-16	1	57	4	3	388	30	1	0	0	0	0	16	0	0	0	0	0	0	0	16
2018-04-16	2	58	4	3	288	28	1	0	0	0	0	16	0	0	0	0	0	0	0	16
2018-04-16	3	59	4	3	319	27	1	0	0	0	0	16	0	0	0	0.125	0.125	0.125	0.125	15.875
2018-04-16	4	60	4	3	310	28.5	1	0	0	0	0	16	0	0	0
2018-04-16	5	61	4	3	287	26.5	1	0	0	0	0	16	0	0	0
2018-04-16	6	62	4	3	311	28	1	0	0	0	0	16	0	0	0
2018-04-16	7	63	4	3	285	26.5	1	0	0	0	0	16	0	0	0
2018-04-16	8	64	4	3	314	28	1	0	0	0	0	16	0	0	0
2018-04-16	1	89	8	3	424	30.5	1	0	0	0	0	16	0	0	0
2018-04-16	2	90	8	3	305	29	1	0	0	0	0	16	0	0	0
2018-04-16	3	91	8	3	261	26.5	1	0	0	0	0	16	0	0	0
2018-04-16	4	92	8	3	319	28	1	0	0	0	0	16	0	0	0
2018-04-16	5	93	8	3	381	28	1	0	0	0	0	16	0	0	0
2018-04-16	6	94	8	3	314	27.5	1	0	0	0	0	16	0	0	0
2018-04-16	7	95	8	3	417	30	1	0	0	0	0	16	0	0	0
2018-04-16	8	96	8	3	336	28.5	1	0	0	0	0	16	0	0	0
2018-04-16	1	105	10	3	346	29	1	0	0	0	0	16	0	0	0
2018-04-16	2	106	10	3	342	29	1	0	0	0	0	16	0	0	0
2018-04-16	3	107	10	3	326	29	1	1	1	1	1	15	0.0625	0.25	0
2018-04-16	4	108	10	3	287	27	1	0	0	0	0	16	0	0	0
2018-04-16	5	109	10	3	253	26	1	0	0	0	0	16	0	0	0
2018-04-16	6	110	10	3	244	27	1	0	0	0	0	16	0	0	0
2018-04-16	7	111	10	3	341	29	1	0	0	0	0	16	0	0	0
2018-04-16	8	112	10	3	237	25.5	1	0	0	0	0	16	0	0	0
2018-04-16	1	121	2	4	295	27.5	1	0	0	0	0	16	0	0	0	0.125	0.125	0.125	0.125	15.875
2018-04-16	2	122	2	4	445	32	1	0	0	0	0	16	0	0	0	0.25	0.25	0.125	0.25	15.875
2018-04-16	3	123	2	4	341	29	1	0	0	0	0	16	0	0	0	0.5	0.75	0.5	1.125	15.5
2018-04-16	4	124	2	4	292	27.5	1	0	0	0	0	16	0	0	0
2018-04-16	5	125	2	4	389	30	1	1	1	1	1	15	0.0625	0.25	0
2018-04-16	6	126	2	4	361	30	1	0	0	0	0	16	0	0	0
2018-04-16	7	127	2	4	365	29	1	0	0	0	0	16	0	0	0
2018-04-16	8	128	2	4	346	30	1	0	0	0	0	16	0	0	0
2018-04-16	1	73	6	4	333	29	1	0	0	0	0	16	0	0	0
2018-04-16	2	74	6	4	384	31	1	0	0	0	0	16	0	0	0
2018-04-16	3	75	6	4	343	30.5	1	0	0	0	0	16	0	0	0
2018-04-16	4	76	6	4	441	32	1	0	0	0	0	16	0	0	0
2018-04-16	5	77	6	4	372	29	1	0	0	0	0	16	0	0	0
2018-04-16	6	78	6	4	402	31	1	2	2	1	2	15	0.125	0.5	0
2018-04-16	7	79	6	4	331	29	1	0	0	0	0	16	0	0	0
2018-04-16	8	80	6	4	308	28	1	0	0	0	0	16	0	0	0
2018-04-16	1	41	12	4	380	29	1	0	0	0	0	16	0	0	0
2018-04-16	2	42	12	4	251	26.5	1	2	3	2	6	14	0.1875	0.543906	0
2018-04-16	3	43	12	4	348	29.5	1	0	0	0	0	16	0	0	0
2018-04-16	4	44	12	4	311	28.5	1	0	1	1	1	15	0	0	0
2018-04-16	5	45	12	4	276	27.5	1	2	2	1	2	15	0.125	0.5	0
2018-04-16	6	46	12	4	348	29	1	0	0	0	0	16	0	0	0
2018-04-16	7	47	12	4	339	29.5	1	0	0	0	0	16	0	0	0
2018-04-16	8	48	12	4	378	30	1	0	0	0	0	16	0	0	0

## Sheet: week1 
Date	Fish	sample ID	Tank	Diet	Mass	Length	Sampling	Overall gill score	total score	Gills Affected	Severity	Healthy Gills	Average	St Dev	Median	Overall gill score	total score	Gills Affected	Severity	Healthy Gills
2018-04-24	1	219	7	1	353	28.5	2	2	4	3	12	13	0.25	0.57735	0	0.3	0.6	0.5	1.6	15.5
2018-04-24	2	220	7	1	484	31	2	0	0	0	0	16	0	0	0	0.3	0.4	0.4	0.6	15.6
2018-04-24	3	221	7	1	486	31.5	2	1	2	2	4	14	0.125	0.341565	0	0.4	0.4	0.3	0.4	15.7
2018-04-24	4	222	7	1	310	27.5	2	0	0	0	0	16	0	0	0
2018-04-24	5	223	7	1	285	27	2	0	0	0	0	16	0	0	0
2018-04-24	6	224	7	1	342	29	2	0	0	0	0	16	0	0	0
2018-04-24	7	225	7	1	317	27	2	0	0	0	0	16	0	0	0
2018-04-24	8	226	7	1	285	27.5	2	0	0	0	0	16	0	0	0
2018-04-24	9	227	7	1	341	29	2	0	0	0	0	16	0	0	0
2018-04-24	10	228	7	1	442	32	2	0	0	0	0	16	0	0	0
2018-04-24	1	259	11	1	291	27.5	2	1	1	1	1	15	0.0625	0.25	0
2018-04-24	2	260	11	1	416	30.5	2	1	2	2	4	14	0.125	0.5	0
2018-04-24	3	261	11	1	334	29.5	2	0	0	0	0	16	0	0	0
2018-04-24	4	262	11	1	292	28	2	0	0	0	0	16	0	0	0
2018-04-24	5	263	11	1	257	26	2	0	0	0	0	16	0	0	0
2018-04-24	6	264	11	1	405	30.5	2	1	1	1	1	15	0.0625	0.25	0
2018-04-24	7	265	11	1	348	29.5	2	0	0	0	0	16	0	0	0
2018-04-24	8	266	11	1	315	29	2	0	0	0	0	16	0	0	0
2018-04-24	9	267	11	1	346	28.5	2	0	0	0	0	16	0	0	0
2018-04-24	10	268	11	1	395	30	2	0	0	0	0	16	0	0	0
2018-04-24	1	279	13	1	334	28	2	0	0	0	0	16	0	0	0
2018-04-24	2	280	13	1	507	32	2	0	0	0	0	16	0	0	0
2018-04-24	3	281	13	1	442	30.5	2	0	0	0	0	16	0	0	0
2018-04-24	4	282	13	1	360	30	2	2	2	1	2	15	0.125	0.5	0
2018-04-24	5	283	13	1	356	30	2	0	0	0	0	16	0	0	0
2018-04-24	6	284	13	1	340	28.5	2	0	0	0	0	16	0	0	0
2018-04-24	7	285	13	1	341	29	2	0	0	0	0	16	0	0	0
2018-04-24	8	286	13	1	440	30.5	2	0	0	0	0	16	0	0	0
2018-04-24	9	287	13	1	358	28.5	2	1	1	1	1	15	0.0625	0.25	0
2018-04-24	10	288	13	1	343	28.5	2	1	1	1	1	15	0.0625	0.25	0
2018-04-24	1	179	3	2	331	29	2	1	2	2	4	14	0.125	0.341565	0	0.6	0.9	0.9	1.5	15.1
2018-04-24	2	180	3	2	365	29	2	0	0	0	0	16	0	0	0	0.4	0.6	0.6	1.2	15.4
2018-04-24	3	181	3	2	414	30	2	0	0	0	0	16	0	0	0	0.6	0.9	0.777778	1.3	15.3
2018-04-24	4	182	3	2	346	28.5	2	1	1	1	1	15	0.0625	0.25	0
2018-04-24	5	183	3	2	333	29.5	2	0	0	0	0	16	0	0	0
2018-04-24	6	184	3	2	443	30.5	2	1	2	2	4	14	0.125	0.341565	0
2018-04-24	7	185	3	2	436	30	2	1	1	1	1	15	0.0625	0.25	0
2018-04-24	8	186	3	2	342	28	2	1	2	2	4	14	0.125	0.341565	0
2018-04-24	9	187	3	2	460	32	2	0	0	0	0	16	0	0	0
2018-04-24	10	188	3	2	271	26.5	2	1	1	1	1	15	0.0625	0.25	0
2018-04-24	1	199	5	2	424	31.5	2	1	3	3	9	13	0.1875	0.403113	0
2018-04-24	2	200	5	2	444	32.5	2	1	1	1	1	15	0.0625	0.25	0
2018-04-24	3	201	5	2	444	31.5	2	1	1	1	1	15	0.0625	0.25	0
2018-04-24	4	202	5	2	445	31	2	0	0	0	0	16	0	0	0
2018-04-24	5	203	5	2	313	27.5	2	1	1	1	1	15	0.0625	0.25	0
2018-04-24	6	204	5	2	403	31.5	2	0	0	0	0	16	0	0	0
2018-04-24	7	205	5	2	345	30	2	0	0	0	0	16	0	0	0
2018-04-24	8	206	5	2	305	28	2	0	0	0	0	16	0	0	0
2018-04-24	9	207	5	2	335	29.5	2	0	0	0	0	16	0	0	0
2018-04-24	10	208	5	2	279	26.5	2	0	0	0	0	16	0	0	0
2018-04-24	1	239	9	2	359	30	2	0	0	0	0	16	0	0	0
2018-04-24	2	240	9	2	338	28	2	0	0	0	0	16	0	0	0
2018-04-24	3	241	9	2	398	30	2	1	2	2	4	14	0.125	0.341565	0
2018-04-24	4	242	9	2	285	27	2	1	1	1	1	15	0.0625	0.25	0
2018-04-24	5	243	9	2	334	29.5	2	1	2	2	4	14	0.125	0.341565	0
2018-04-24	6	244	9	2	394	29	2	0	0	0	0	16	0	0	0
2018-04-24	7	245	9	2	303	27	2	0	0	0	0	16	0	0	0
2018-04-24	8	246	9	2	363	29	2	2	3	1	3	15	0.1875	0.543906	0
2018-04-24	9	247	9	2	141	30.5	2	1	1	1	1	15	0.0625	0.25	0
2018-04-24	10	248	9	2	364	27.5	2	0	0		0	16	0	0	0
2018-04-24	1	189	4	3	318	27	2	1	1	1	1	15	0.0625	0.25	0	0.7	0.8	0.8	1	15.2
2018-04-24	2	190	4	3	398	30	2	1	1	1	1	15	0.0625	0.25	0	0.2	0.2	0.2	0.2	15.8
2018-04-24	3	191	4	3	391	29.5	2	0	0	0	0	16	0	0	0	0.7	1	1.125	1.9	15.1
2018-04-24	4	192	4	3	309	28.5	2	1	1	1	1	15	0.0625	0.25	0
2018-04-24	5	193	4	3	371	29	2	1	2	2	4	14	0.125	0.341565	0
2018-04-24	6	194	4	3	393	30	2	1	1	1	1	15	0.0625	0.25	0
2018-04-24	7	195	4	3	440	31	2	1	1	1	1	15	0.0625	0.25	0
2018-04-24	8	196	4	3	316	28.5	2	0	0	0	0	16	0	0	0
2018-04-24	9	197	4	3	308	28	2	1	1	1	1	15	0.0625	0.25	0
2018-04-24	10	198	4	3	377	30	2	0	0	0	0	16	0	0	0
2018-04-24	1	229	8	3	339	28	2	1	1	1	1	15	0.0625	0.25	0
2018-04-24	2	230	8	3	385	29	2	0	0	0	0	16	0	0	0
2018-04-24	3	231	8	3	385	30	2	1	1	1	1	15	0.0625	0.25	0
2018-04-24	4	232	8	3	336	28	2	0	0	0	0	16	0	0	0
2018-04-24	5	233	8	3	243	27	2	0	0	0	0	16	0	0	0
2018-04-24	6	234	8	3	423	31.5	2	0	0	0	0	16	0.0625	0.25	0
2018-04-24	7	235	8	3	293	26.5	2	0	0	0	0	16	0	0	0
2018-04-24	8	236	8	3	341	29	2	0	0	0	0	16	0	0	0
2018-04-24	9	237	8	3	382	30	2	0	0	0	0	16	0	0	0
2018-04-24	10	238	8	3	361	28.5	2	0	0	0	0	16	0	0	0
2018-04-24	1	249	10	3	360	30	2	2	3	2	6	14	0.1875	0.543906	0
2018-04-24	2	250	10	3	397	30	2	0	0	0	0	16	0	0	0
2018-04-24	3	251	10	3	429	31	2	0	0	0	0	16	0	0	0
2018-04-24	4	252	10	3	337	28.5	2	1	1	1	1	15	0.0625	0.25	0
2018-04-24	5	253	10	3	350	29	2	1	1	1	1	15	0.0625	0.25	0
2018-04-24	6	254	10	3	412	31	2	0	0		0	16	0	0	0
2018-04-24	7	255	10	3	380	30	2	1	1	1	1	15	0.0625	0.25	0
2018-04-24	8	256	10	3	380	30	2	0	0		0	16	0	0	0
2018-04-24	9	257	10	3	323	27	2	1	3	3	9	13	0.1875	0.403113	0
2018-04-24	10	258	10	3	411	30	2	1	1	1	1	15	0.0625	0.25	0
2018-04-24	1	169	2	4	396	30.5	2	0	0	0	0	16	0	0	0	0.5	0.7	0.7	1.1	15.3
2018-04-24	2	170	2	4	362	28.5	2	1	1	1	1	15	0.0625	0.25	0	1	1.5	1.3	3.1	14.7
2018-04-24	3	171	2	4	358	29	2	0	0	0	0	16	0	0	0	0.5	0.8	0.6	1.6	15.4
2018-04-24	4	172	2	4	427	31.5	2	1	1	1	1	15	0.125	0.341565	0
2018-04-24	5	173	2	4	388	30.5	2	0	0	0	0	16	0	0	0
2018-04-24	6	174	2	4	344	29	2	1	2	2	4	14	0.125	0.341565	0
2018-04-24	7	175	2	4	456	31.5	2	0	0	0	0	16	0	0	0
2018-04-24	8	176	2	4	337	29	2	0	0	0	0	16	0	0	0
2018-04-24	9	177	2	4	316	27.5	2	1	1	1	1	15	0.0625	0.25	0
2018-04-24	10	178	2	4	393	29	2	1	2	2	4	14	0.125	0.341565	0
2018-04-24	1	209	6	4	345	29.5	2	1	2	2	4	14	0.125	0.341565	0
2018-04-24	2	210	6	4	321	28.5	2	1	1	1	1	15	0.0625	0.25	0
2018-04-24	3	211	6	4	317	27	2	1	1	1	1	15	0.0625	0.25	0
2018-04-24	4	212	6	4	473	32.5	2	1	1	2	2	14	0.125	0.341565	0
2018-04-24	5	213	6	4	387	30	2	2	5	3	15	13	0.3125	0.704154	0
2018-04-24	6	214	6	4	345	28.5	2	0	0	0	0	16	0	0	0
2018-04-24	7	215	6	4	358	29	2	1	1	1	1	15	0.0625	0.25	0
2018-04-24	8	216	6	4	401	31	2	1	1	1	1	15	0.0625	0.25	0
2018-04-24	9	217	6	4	419	31.5	2	0	0	0	0	16	0	0	0
2018-04-24	10	218	6	4	346	29	2	2	3	2	6	14	0.1875	0.543906	0
2018-04-24	1	269	12	4	347	29	2	0	0	0	0	16	0	0	0
2018-04-24	2	270	12	4	401	31	2	2	3	2	6	14	0.1875	0.543906	0
2018-04-24	3	271	12	4	371	29.5	2	0	0	0	0	16	0	0	0
2018-04-24	4	272	12	4	352	29	2	2	3	2	6	14	0.1875	0.543906	0
2018-04-24	5	273	12	4	378	29	2	0	0	0	0	16	0	0	0
2018-04-24	6	274	12	4	456	32	2	0	0	0	0	16	0	0	0
2018-04-24	7	275	12	4	437	32	2	0	0	0	0	16	0	0	0
2018-04-24	8	276	12	4	476	32	2	0	0	0	0	16	0	0	0
2018-04-24	9	277	12	4	364	30.5	2	0	0	0	0	16	0	0	0
2018-04-24	10	278	12	4	342	29.5	2	1	2	2	4	14	0.125	0.341565	0
																		Diet1	Diet2	Diet6	Diet1H
																	Number of values	10	10	10	10
																	Minimum	0	0.3333	0	0.3333
																	Maximum	1.667	1.667	1.667	2.333
																	Range	1.667	1.333	1.667	2
																	Mean	0.4667	0.8	0.6667	1	0.73335
																	Std. Deviation	0.5018	0.5259	0.5212	0.7536	0.224417
																	Std. Error of Mean	0.1587	0.1663	0.1648	0.2383

## Sheet: week 2
Date	Fish	sample ID	Tank	Diet	Mass	Length	Sampling	Overall gill score	total score	Gills Affected	Severity	Healthy Gills	Average	St Dev	Median	Overall gill score	total score	Gills Affected	Severity	Healthy Gills
2018-05-02	1	379	7	1	356	29	3	1	1	1	1	15	0.0625	0.25	0	1.1	2	1.6	4.6	14.4
2018-05-02	2	380	7	1	413	30.5	3	2	5	3	15	13	0.3125	0.704154	0	0.8	1.3	1.1	3	14.9
2018-05-02	3	381	7	1	381	30	3	1	1	1	1	15	0.0625	0.25	0	0.9	1.3	1	2.7	15
2018-05-02	4	382	7	1	462	32	3	1	1	1	1	15	0.0625	0.25	0
2018-05-02	5	383	7	1	329	27.5	3	1	2	2	4	14	0.125	0.341565	0
2018-05-02	6	384	7	1	280	26	3	1	2	2	4	14	0.125	0.341565	0
2018-05-02	7	385	7	1	408	30	3	0	0	0	0	16	0	0	0
2018-05-02	8	386	7	1	490	33	3	1	2	2	4	14	0.125	0.341565	0
2018-05-02	9	387	7	1	428	30.5	3	1	1	1	1	15	0.0625	0.25	0
2018-05-02	10	388	7	1	482	31.5	3	2	5	3	15	13	0.3125	0.704154	0
2018-05-02	1	419	11	1	377	29	3	1	3	3	9	13	0.1875	0.403113	0
2018-05-02	2	420	11	1	428	31	3	2	3	2	6	14	0.1875	0.543906	0
2018-05-02	3	421	11	1	550	32.5	3	2	4	3	12	13	0.25	0.57735	0
2018-05-02	4	422	11	1	383	29.5	3	1	1	1	1	15	0.0625	0.25	0
2018-05-02	5	423	11	1	525	33.5	3	0	0	0	0	16	0	0	0
2018-05-02	6	424	11	1	368	29.5	3	1	1	1	1	15	0.0625	0.25	0
2018-05-02	7	425	11	1	512	33	3	0	0	0	0	16	0	0	0
2018-05-02	8	426	11	1	505	31.5	3	1	1	1	1	15	0.125	0.341565	0
2018-05-02	9	427	11	1	396	31	3	0	0	0	0	16	0	0	0
2018-05-02	10	428	11	1	374	29	3	0	0	0	0	16	0	0	0
2018-05-02	1	439	13	1	433	31	3	0	0	0	0	16	0	0	0
2018-05-02	2	440	13	1	373	28	3	3	5	3	15	13	0.3125	0.7932	0
2018-05-02	3	441	13	1	393	30	3	0	0	0	0	16	0	0	0
2018-05-02	4	442	13	1	436	31	3	0	0	0	0	16	0	0	0
2018-05-02	5	443	13	1	286	26	3	1	2	2	4	14	0.1875	0.403113	0
2018-05-02	6	444	13	1	370	29	3	0	0	0	0	16	0	0	0
2018-05-02	7	445	13	1	439	32	3	1	1	1	1	15	0.0625	0.25	0
2018-05-02	8	446	13	1	458	31	3	1	2	2	4	14	0.125	0.341565	0
2018-05-02	9	447	13	1	366	29	3	2	2	1	2	15	0.125	0.5	0
2018-05-02	10	448	13	1	418	31	3	1	1	1	1	15	0.0625	0.25	0
2018-05-02	1	339	3	2	357	29.5	3	0	0	0	0	16	0	0	0	0.6	1.5	1.5	4.7	14.5
2018-05-02	2	340	3	2	464	31.5	3	0	0	0	0	16	0	0	0	1.1	2.8	2.6	10.4	13.4
2018-05-02	3	341	3	2	469	31	3	1	3	3	9	13	0.1875	0.403113	0	0.5	1	1	2.8	15
2018-05-02	4	342	3	2	500	33	3	1	4	4	16	12	0.25	0.447214	0
2018-05-02	5	343	3	2	445	31.5	3	1	4	4	16	12	0.25	0.447214	0
2018-05-02	6	344	3	2	294	28	3	1	1	1	1	15	0.125	0.341565	0
2018-05-02	7	345	3	2	415	31	3	0	0	0	0	16	0.0625	0.25	0
2018-05-02	8	346	3	2	325	28	3	1	2	2	4	14	0.1875	0.403113	0
2018-05-02	9	347	3	2	369	29	3	1	1	1	1	15	0.0625	0.25	0
2018-05-02	10	348	3	2	431	30.5	3	0	0	0	0	16	0	0	0
2018-05-02	1	359	5	2	415	29.5	3	1	2	2	4	14	0.125	0.341565	0
2018-05-02	2	360	5	2	447	31	3	2	7	6	42	10	0.4375	0.629153	0
2018-05-02	3	361	5	2	384	29	3	1	2	2	4	14	0.125	0.341565	0
2018-05-02	4	362	5	2	407	31	3	2	5	4	20	12	0.3125	0.60208	0
2018-05-02	5	363	5	2	4017	30.5	3	1	4	4	16	12	0.25	0.447214	0
2018-05-02	6	364	5	2	493	33	3	1	2	2	4	14	0.125	0.341565	0
2018-05-02	7	365	5	2	433	30.5	3	1	2	2	4	14	0.125	0.341565	0
2018-05-02	8	366	5	2	354	29	3	1	3	3	9	13	0.1875	0.403113	0
2018-05-02	9	367	5	2	433	30.5	3	0	0	0	0	16	0	0	0
2018-05-02	10	368	5	2	370	28.5	3	1	1	1	1	15	0.0625	0.25	0
2018-05-02	1	399	9	2	420	30.5	3	0	0	0	0	16	0	0	0
2018-05-02	2	400	9	2	393	30	3	1	1	1	1	15	0.0625	0.25	0
2018-05-02	3	401	9	2	270	27	3	0	0	0	0	16	0	0	0
2018-05-02	4	402	9	2	327	28	3	1	1	1	1	15	0.0625	0.25	0
2018-05-02	5	403	9	2	456	31	3	1	3	3	9	13	0.1875	0.403113	0
2018-05-02	6	404	9	2	544	33	3	0	0	0	0	16	0	0	0
2018-05-02	7	405	9	2	475	31	3	1	1	1	1	15	0.0625	0.25	0
2018-05-02	8	406	9	2	363	28.5	3	0	0	0	0	16	0	0	0
2018-05-02	9	407	9	2	381	30	3	1	4	4	16	12	0.25	0.447214	0
2018-05-02	10	408	9	2	299	27.5	3	0	0	0	0	16	0	0	0
2018-05-02	1	349	4	3	349	28	3	1	2	2	4	14	0.125	0.341565	0	0.9	1.9	1.8	5.3	14.2
2018-05-02	2	350	4	3	350	28	3	0	0	0	0	16	0	0	0	0.8	1.2	1.1	2.2	14.9
2018-05-02	3	351	4	3	351	32	3	1	5	5	25	11	0.3125	0.478714	0	0.7	1.3	1.2	3.1	14.8
2018-05-02	4	352	4	3	352	30	3	2	2	1	2	15	0.125	0.5	0
2018-05-02	5	353	4	3	353	28	3	0	0	0	0	16	0	0	0
2018-05-02	6	354	4	3	354	32	3	1	3	3	9	13	0.1875	0.403113	0
2018-05-02	7	355	4	3	355	31	3	1	1	1	1	15	0.0625	0.25	0
2018-05-02	8	356	4	3	356	27.5	3	1	2	2	4	14	0.125	0.341565	0
2018-05-02	9	357	4	3	357	30	3	1	2	2	4	14	0.125	0.341565	0
2018-05-02	10	358	4	3	358	27.5	3	1	2	2	4	14	0.1875	0.403113	0
2018-05-02	1	389	8	3	462	31	3	0	0	0	0	16	0	0	0
2018-05-02	2	390	8	3	439	30.5	3	1	3	3	9	13	0.1875	0.403113	0
2018-05-02	3	391	8	3	335	29.5	3	1	2	2	4	14	0.125	0.341565	0
2018-05-02	4	392	8	3	379	29.5	3	1	1	1	1	15	0.0625	0.25	0
2018-05-02	5	393	8	3	321	28.5	3	0	0	0	0	16	0	0	0
2018-05-02	6	394	8	3	289	27	3	0	0	0	0	16	0	0	0
2018-05-02	7	35	8	3	438	30	3	1	1	1	1	15	0.0625	0.25	0
2018-05-02	8	396	8	3	333	30.5	3	1	1	1	1	15	0.0625	0.25	0
2018-05-02	9	397	8	3	414	30.5	3	1	2	2	4	14	0.125	0.341565	0
2018-05-02	10	398	8	3	306	28	3	2	2	1	2	15	0.125	0.5	0
2018-05-02	1	409	10	3	444	31	3	1	1	1	1	15	0.0625	0.25	0
2018-05-02	2	410	10	3	456	31.5	3	1	1	1	1	15	0.0625	0.25	0
2018-05-02	3	411	10	3	342	28.5	3	0	0	0	0	16	0	0	0
2018-05-02	4	412	10	3	395	30.5	3	1	2	2	4	14	0.125	0.341565	0
2018-05-02	5	413	10	3	371	28.5	3	1	3	3	9	13	0.1875	0.403113	0
2018-05-02	6	414	10	3	289	27.5	3	0	0	0	0	16	0	0	0
2018-05-02	7	415	10	3	384	30.5	3	0	0	0	0	16	0	0	0
2018-05-02	8	416	10	3	307	28	3	1	2	2	4	14	0.125	0.341565	0
2018-05-02	9	417	10	3	474	32	3	0	0	0	0	16	0	0	0
2018-05-02	10	418	10	3	396	30.5	3	2	4	3	12	13	0.25	0.57735	0
2018-05-02	1	329	2	4	412	30	3	1	3	3	9	13	0.1875	0.403113	0	0.8	1.7	1.6	4.5	14.4
2018-05-02	2	330	2	4	392	29	3	0	0	0	0	16	0	0	0	1.1	2.3	2.1	7.1	13.9
2018-05-02	3	331	2	4	501	32	3	1	3	3	9	13	0.1875	0.403113	0	0.8	0.9	0.8	1.1	15.2
2018-05-02	4	332	2	4	415	30.5	3	1	1	1	1	15	0.0625	0.25	0
2018-05-02	5	333	2	4	380	30	3	1	1	1	1	15	0.0625	0.25	0
2018-05-02	6	334	2	4	403	29.5	3	0	0	0	0	16	0.0625	0.25	0
2018-05-02	7	335	2	4	447	31	3	0	0	0	0	16	0	0	0
2018-05-02	8	336	2	4	364	30	3	1	2	2	4	14	0.125	0.341565	0
2018-05-02	9	337	2	4	345	29	3	2	4	3	12	13	0.25	0.57735	0
2018-05-02	10	338	2	4	328	28.5	3	1	3	3	9	13	0.1875	0.403113	0
2018-05-02	1	369	6	4	404	30	3	0	0	0	0	16	0	0	0
2018-05-02	2	370	6	4	360	29.5	3	1	2	2	4	14	0.125	0.341565	0
2018-05-02	3	371	6	4	343	28.5	3	1	2	2	4	14	0.125	0.341565	0
2018-05-02	4	372	6	4	379	29.5	3	1	5	5	25	11	0.3125	0.478714	0
2018-05-02	5	373	6	4	321	27.5	3	1	1	1	1	15	0.0625	0.25	0
2018-05-02	6	374	6	4	366	28.5	3	1	3	3	9	13	0.1875	0.403113	0
2018-05-02	7	375	6	4	396	30	3	1	1	1	1	15	0.0625	0.25	0
2018-05-02	8	376	6	4	447	31	3	2	5	4	20	12	0.3125	0.60208	0
2018-05-02	9	377	6	4	615	35	3	1	1	1	1	15	0.0625	0.25	0
2018-05-02	10	378	6	4	377	30	3	2	3	2	6	14	0.1875	0.543906	0
2018-05-02	1	429	12	4	474	32	3	1	1	1	1	15	0.0625	0.25	0
2018-05-02	2	430	12	4	417	31.5	3	1	2	2	4	14	0.125	0.341565	0
2018-05-02	3	431	12	4	349	29	3	0	0	0	0	16	0	0	0
2018-05-02	4	432	12	4	447	32	3	0	0	0	0	16	0	0	0
2018-05-02	5	433	12	4	491	33	3	1	1	1	1	15	0.0625	0.25	0
2018-05-02	6	434	12	4	385	30	3	1	1	1	1	15	0.0625	0.25	0
2018-05-02	7	435	12	4	396	31	3	2	2	1	2	15	0.125	0.5	0
2018-05-02	8	436	12	4	411	31	3	1	1	1	1	15	0.0625	0.25	0
2018-05-02	9	437	12	4	403	30	3	1	1	1	1	15	0.0625	0.25	0
2018-05-02	10	438	12	4	437	32	3	0	0	0	0	16	0	0	0
																			Diet1	Diet2	Diet6	Diet1H
																		Number of values	10	10	10	10
																		Minimum	0.3333	0.3333	0.6667	1	1.6
																		Maximum	4.333	3.667	2.667	2.667	0.130583
																		Range	4	3.333	2	1.667
																		Mean	1.533	1.767	1.467	1.633
																		Std. Deviation	1.102	1.123	0.6325	0.5317
																		Std. Error of Mean	0.3485	0.355	0.2	0.1681
																		Sum	15.33	17.67	14.67	16.33

## Sheet: week3
week 3
Date	Fish	sample ID	Tank	Diet	Mass	Length	K	Overall gill score	total score	Gills Affected	Severity	Overall gill score	total score	Gills Affected	Severity
2018-05-08	1	539	7	1	513	32.5	0.014944	2	4	3	12	1.2	2.5	2.2	7.6			3	3	3	2
2018-05-08	2	540	7	1	445	30.5	0.0156841	1	4	4	16	0.9	1.7	1.5	4.4			2	1	0	3
2018-05-08	3	541	7	1	549	33	0.0152767	1	1	1	1	0.7	1.6	1.6	4.4			0	1	7	2
2018-05-08	4	542	7	1	415	30	0.0153704	1	5	5	25
2018-05-08	5	543	7	1	369	30	0.0136667	1	3	3	9
2018-05-08	6	544	7	1	394	29	0.0161548	0	0	0	0
2018-05-08	7	545	7	1	384	29.5	0.0149577	2	3	2	6
2018-05-08	8	546	7	1	352	28	0.016035	2	2	1	2							2.2	2	2.3	3.1
2018-05-08	9	547	7	1	324	28	0.0147595	1	1	1	1							1.5	1.6	0.4	0.9
2018-05-08	10	548	7	1	365	26	0.020767	1	2	2	4							1.6	2	1.8	1.1
2018-05-08	1	579	11	1	371	30	0.0137407	2	2	1	2
2018-05-08	2	580	11	1	472	31.5	0.0151012	1	2	2	4
2018-05-08	3	581	11	1	460	32	0.0140381	0	0	0	0
2018-05-08	4	582	11	1	336	28.5	0.0145146	1	3	3	9
2018-05-08	5	583	11	1	410	30	0.0151852	0	0	0	0
2018-05-08	6	584	11	1	428	34	0.0108895	1	1	1	1
2018-05-08	7	585	11	1	374	29.5	0.0145682	0	0	0	0
2018-05-08	8	586	11	1	501	33	0.0139411	1	2	2	4
2018-05-08	9	587	11	1	515	32.5	0.0150023	2	5	4	20
2018-05-08	10	588	11	1	358	29.5	0.013945	1	2	2	4
2018-05-08	1	599	13	1	380	30	0.0140741	0	0	0	0
2018-05-08	2	600	13	1	335	28	0.0152606	1	1	1	1
2018-05-08	3	601	13	1	397	29.5	0.0154641	1	3	3	9
2018-05-08	4	602	13	1	360	29	0.0147608	1	1	1	1
2018-05-08	5	603	13	1	330	27.5	0.0158678	0	0	0	0
2018-05-08	6	604	13	1	383	29.5	0.0149188	1	2	2	4
2018-05-08	7	605	13	1	536	33	0.014915	1	2	2	4
2018-05-08	8	606	13	1	460	31.5	0.0147172	0	0	0	0
2018-05-08	9	607	13	1	471	31	0.0158101	1	3	3	9
2018-05-08	10	608	13	1	462	31.5	0.0147812	1	4	4	16
2018-05-08	1	499	3	2	443	30.5	0.0156136	1	2	2	4	1.1	2.3	2	6.7
2018-05-08	2	500	3	2	426	31.5	0.0136294	0	0	0	0	1	1.8	1.6	3.8
2018-05-08	3	501	3	2	370	28	0.016855	1	1	1	1	0.8	2.2	2	10.2
2018-05-08	4	502	3	2	400	30.5	0.0140981	0	0	0	0
2018-05-08	5	503	3	2	377	29	0.0154578	1	4	4	16
2018-05-08	6	504	3	2	509	33	0.0141637	2	3	2	6
2018-05-08	7	505	3	2	419	30.5	0.0147678	1	2	2	4
2018-05-08	8	506	3	2	389	29.5	0.0151525	1	2	2	4
2018-05-08	9	507	3	2	378	30	0.014	2	4	3	12
2018-05-08	10	508	3	2	459	31	0.0154073	2	5	4	20
2018-05-08	1	519	5	2	476	33	0.0132454	1	1	1	1
2018-05-08	2	520	5	2	458	30	0.016963	1	2	2	4
2018-05-08	3	521	5	2	486	32.5	0.0141575	2	4	2	8
2018-05-08	4	522	5	2	435	30	0.0161111	1	1	1	1
2018-05-08	5	523	5	2	359	28.5	0.0155081	1	3	3	9
2018-05-08	6	524	5	2	455	32.5	0.0132544	1	2	2	4
2018-05-08	7	525	5	2	397	30.5	0.0139924	1	1	1	1
2018-05-08	8	526	5	2	352	29.5	0.0137112	0	0	0	0
2018-05-08	9	527	5	2	460	32.5	0.0134001	1	1	1	1
2018-05-08	10	528	5	2	323	28	0.0147139	1	3	3	9
2018-05-08	1	559	9	2	357	28.5	0.0154217	1	1	1	1
2018-05-08	2	560	9	2	367	29	0.0150478	1	1	1	1
2018-05-08	3	561	9	2	371	29.5	0.0144513	1	2	2	4
2018-05-08	4	562	9	2	355	28.5	0.0153354	2	5	3	15
2018-05-08	5	563	9	2	449	30.5	0.0158251	1	1	1	1
2018-05-08	6	564	9	2	447	31.5	0.0143013	0	0	0	0
2018-05-08	7	565	9	2	565	34	0.0143751	1	8	8	64
2018-05-08	8	566	9	2	317	27.5	0.0152427	1	4	4	16
2018-05-08	9	567	9	2	448	32	0.0136719	0	0	0	0
2018-05-08	10	568	9	2	422	31	0.0141654	0	0	0	0
2018-05-08	1	509	4	3	419	32	0.0127869	2	4	3	12	1.1	2.7	2.3	11.8
2018-05-08	2	510	4	3	384	30.5	0.0135342	1	1	1	1	0.4	0.4	0.4	0.4
2018-05-08	3	511	4	3	442	31.5	0.0141413	2	5	4	20	1.6	2.7	1.8	6.7
2018-05-08	4	512	4	3	434	31.5	0.0138854	1	1	1	1
2018-05-08	5	513	4	3	364	30	0.0134815	0	0	0	0
2018-05-08	6	514	4	3	365	30	0.0135185	0	0	0	0
2018-05-08	7	515	4	3	361	30	0.0133704	2	4	3	12
2018-05-08	8	516	4	3	319	27	0.0162069	1	4	4	16
2018-05-08	9	517	4	3	344	28	0.0156706	2	8	7	56
2018-05-08	10	518	4	3	426	30.5	0.0150145	0	0	0	0
2018-05-08	1	549	8	3	316	28	0.014395	1	1	1	1
2018-05-08	2	550	8	3	342	31	0.01148	0	0	0	0
2018-05-08	3	551	8	3	306	29	0.0125466	1	1	1	1
2018-05-08	4	552	8	3	407	31	0.0136618	1	1	1	1
2018-05-08	5	553	8	3	324	28	0.0147595	0	0	0	0
2018-05-08	6	554	8	3	392	31	0.0131583	0	0	0	0
2018-05-08	7	555	8	3	352	29	0.0144327	0	0	0	0
2018-05-08	8	556	8	3	298	27.5	0.0143291	1	1	1	1
2018-05-08	9	557	8	3	357	29	0.0146377	0	0	0	0
2018-05-08	10	558	8	3	300	28	0.0136662	0	0	0	0
2018-05-08	1	569	10	3	391	29.5	0.0152304	2	2	1	2
2018-05-08	2	570	10	3	275	28	0.0125273	2	2	1	2
2018-05-08	3	571	10	3	356	29	0.0145967	2	5	4	20
2018-05-08	4	572	10	3	318	29	0.0130387	2	5	3	15
2018-05-08	5	573	10	3	386	30	0.0142963	1	1	1	1
2018-05-08	6	574	10	3	494	32.5	0.0143905	0	0	0	0
2018-05-08	7	575	10	3	360	30	0.0133333	1	1	1	1
2018-05-08	8	576	10	3	514	33	0.0143028	2	3	2	6
2018-05-08	9	577	10	3	421	31	0.0141318	2	4	3	12
2018-05-08	10	578	10	3	328	27.5	0.0157716	2	4	2	8
2018-05-08	1	489	2	4	416	30.5	0.014662	0	0	0	0	1	3.3	3.1	15.9
2018-05-08	2	490	2	4	409	30	0.0151481	2	8	7	56	0.9	1.2	0.9	2.7
2018-05-08	3	491	2	4	531	32.5	0.0154684	1	5	5	25	0.9	1.3	1.1	2.7
2018-05-08	4	492	2	4	502	32.5	0.0146236	1	5	5	25
2018-05-08	5	493	2	4	426	31	0.0142996	1	1	1	1
2018-05-08	6	494	2	4	378	30.5	0.0133227	2	6	5	30
2018-05-08	7	495	2	4	480	32.5	0.0139827	1	3	3	9
2018-05-08	8	496	2	4	433	32	0.0132141	1	3	3	9
2018-05-08	9	497	2	4	467	32.5	0.013604	1	2	2	4
2018-05-08	10	498	2	4	368	28.5	0.0158969	0	0	0	0
2018-05-08	1	529	6	4	471	32.5	0.0137205	0	0	0	0
2018-05-08	2	530	6	4	383	29	0.0157038	2	2	1	2
2018-05-08	3	531	6	4	359	29	0.0147198	0	0	0	0
2018-05-08	4	532	6	4	487	32	0.0148621	0	0	0	0
2018-05-08	5	533	6	4	433	31	0.0145346	2	5	4	20
2018-05-08	6	534	6	4	390	30	0.0144444	1	1	1	1
2018-05-08	7	535	6	4	453	31	0.0152059	1	1	1	1
2018-05-08	8	536	6	4	400	30	0.0148148	2	2	1	2
2018-05-08	9	537	6	4	365	30.5	0.0128645	1	1	1	1
2018-05-08	10	538	6	4	367	29.5	0.0142955	0	0	0	0
2018-05-08	1	589	12	4	431	30.5	0.0151907	1	4	4	16
2018-05-08	2	590	12	4	380	30.5	0.0133932	2	2	1	2
2018-05-08	3	591	12	4	449	32	0.0137024	0	0	0	0
2018-05-08	4	592	12	4	450	32	0.0137329	0	0	0	0
2018-05-08	5	593	12	4	555	34	0.0141207	1	1	1	1
2018-05-08	6	594	12	4	445	31	0.0149374	0	0	0	0
2018-05-08	7	595	12	4	369	29	0.0151298	1	1	1	1
2018-05-08	8	596	12	4	468	32	0.0142822	2	2	1	2
2018-05-08	9	597	12	4	435	30	0.0161111	1	1	1	1
2018-05-08	10	598	12	4	487	32	0.0148621	1	2	2	4
															Diet1	Diet2	Diet6	Diet1H
														Number of values	10	10	10	10
														Minimum	1	1	0	0.6667
														Maximum	3	3.667	4	4
														Range	2	2.667	4	3.333
														Mean	1.933	2.1	1.933	1.933	1.97475
														Std. Deviation	0.7825	0.7706	1.322	0.8999	0.0835
														Std. Error of Mean	0.2475	0.2437	0.4181	0.2846
														Sum	19.33	21	19.33	19.33

## Sheet: week4
week4
Date	Fish	sample ID	Tank	Diet	Mass	Length	K	Overall gill score	total score	Gills Affected	Severity	Overall gill score	total score	Gills Affected	Severity
2018-05-15	64	699	7	1	493	32.5	0.0143614	0	0	0	0	0.428571	0.857143	0.857143	2
2018-05-15	65	700	7	1	395	31	0.013259	1	2	2	4	1.14286	1.42857	1	2.28571
2018-05-15	66	701	7	1	328	29.5	0.0127764	0	0	0	0	0.428571	0.714286	0.428571	0.571429
2018-05-15	67	702	7	1	427	30.5	0.0150497	0	0	0	0
2018-05-15	68	703	7	1	530	32.5	0.0154392	1	3	3	9
2018-05-15	69	704	7	1	474	31.5	0.0151651	0	0	0	0
2018-05-15	70	705	7	1	588	33.5	0.0156402	1	1	1	1
2018-05-15	92	727	11	1	540	33.5	0.0143635	0	0	0	0
2018-05-15	93	728	11	1	402	31	0.013494	1	2	2	4
2018-05-15	94	729	11	1	473	31.5	0.0151332	3	4	2	8
2018-05-15	95	730	11	1	505	32	0.0154114	1	1	1	1
2018-05-15	96	731	11	1	446	31	0.014971	0	0	0	0
2018-05-15	97	732	11	1	493	31.5	0.015773	2	2	1	2
2018-05-15	98	733	11	1	591	33.5	0.01572	1	1	1	1
2018-05-15	106	741	13	1	397	30	0.0147037	0	0	0	0
2018-05-15	107	742	13	1	444	31.5	0.0142053	1	1	1	1
2018-05-15	108	743	13	1	458	32	0.0139771	1	2	1	2
2018-05-15	109	744	13	1	363	29.5	0.0141397	0	1	0	0
2018-05-15	110	745	13	1	476	31.5	0.0152291	1	1	1	1
2018-05-15	111	746	13	1	563	33	0.0156663	0	0	0	0
2018-05-15	112	747	13	1	488	32	0.0148926	0	0	0	0
2018-05-15	36	671	3	2	394	30	0.0145926	1	2	2	4	1.14286	1.42857	1.28571	2
2018-05-15	37	672	3	2	375	29.5	0.0146071	1	1	1	1	0.285714	0.285714	0.285714	0.285714
2018-05-15	38	673	3	2	501	32.5	0.0145944	1	1	1	1	0	0	0	0
2018-05-15	39	674	3	2	499	32.5	0.0145362	1	1	1	1
2018-05-15	40	675	3	2	479	32	0.0146179	2	2	1	2
2018-05-15	41	676	3	2	303	28	0.0138028	1	2	2	4
2018-05-15	42	677	3	2	434	30	0.0160741	1	1	1	1
2018-05-15	50	685	5	2	343	28.5	0.014817	0	0	0	0
2018-05-15	51	686	5	2	599	33.5	0.0159328	0	0	0	0
2018-05-15	52	687	5	2	453	31.5	0.0144933	1	1	1	1
2018-05-15	53	688	5	2	480	31.5	0.0153571	0	0	0	0
2018-05-15	54	689	5	2	512	33.5	0.0136187	0	0	0	0
2018-05-15	55	690	5	2	491	33.5	0.0130601	1	1	1	1
2018-05-15	56	691	5	2	436	32	0.0133057	0	0	0	0
2018-05-15	78	713	9	2	537	33	0.0149428	0	0	0	0
2018-05-15	79	714	9	2	349	29	0.0143097	0	0	0	0
2018-05-15	80	715	9	2	244	25.5	0.0147153	0	0	0	0
2018-05-15	81	716	9	2	352	31	0.0118156	0	0	0	0
2018-05-15	82	717	9	2	434	31	0.0145682	0	0	0	0
2018-05-15	83	718	9	2	401	30	0.0148519	0	0	0	0
2018-05-15	84	719	9	2	280	27.5	0.0134636	0	0	0	0
2018-05-15	44	679	4	3	376	30	0.0139259	0	0	0	0	0.833333	1.5	1.16667	2.83333
2018-05-15	45	680	4	3	425	31	0.0142661	1	1	1	1	0.428571	1	1	3.85714
2018-05-15	46	681	4	3	430	31.5	0.0137574	2	3	2	6	0.285714	1	1	4.14286
2018-05-15	47	682	4	3	472	32	0.0144043	1	1	1	1
2018-05-15	48	683	4	3	423	30	0.0156667	0	1	0	0
2018-05-15	49	684	4	3	399	31	0.0133933	1	3	3	9
2018-05-15	71	706	8	3	386	30	0.0142963	0	0	0	0
2018-05-15	72	707	8	3	380	30	0.0140741	1	1	1	1
2018-05-15	73	708	8	3	488	32	0.0148926	0	0	0	0
2018-05-15	74	709	8	3	361	29.5	0.0140618	1	1	1	1
2018-05-15	75	710	8	3	426	31.5	0.0136294	0	0	0	0
2018-05-15	76	711	8	3	365	29.5	0.0142176	1	5	5	25
2018-05-15	77	712	8	3	278	28.5	0.0120091	0	0	0	0
2018-05-15	85	720	10	3	474	33	0.0131897	0	0	0	0
2018-05-15	86	721	10	3	486	32.5	0.0141575	0	0	0	0
2018-05-15	87	722	10	3	329	28	0.0149872	1	2	2	4
2018-05-15	88	723	10	3	458	31	0.0153738	0	0	0	0
2018-05-15	89	724	10	3	543	34.5	0.0132234	0	0	0	0
2018-05-15	90	725	10	3	503	33	0.0139967	0	0	0	0
2018-05-15	91	726	10	3	304	27	0.0154448	1	5	5	25
2018-05-15	29	664	2	4	398	29.5	0.015503	1	1	1	1	0.571429	1.42857	1.14286	5.71429
2018-05-15	30	665	2	4	360	29.5	0.0140229	0	0	0	0	0.714286	1.14286	1	2.42857
2018-05-15	31	666	2	4	387	31	0.0129905	0	0	0	0	0.142857	0.142857	0.142857	0.142857
2018-05-15	32	667	2	4	386	29.5	0.0150356	0	0	0	0
2018-05-15	33	668	2	4	504	33	0.0140245	2	7	5	35
2018-05-15	34	669	2	4	544	33	0.0151376	1	2	2	4
2018-05-15	35	670	2	4	441	31	0.0148031	0	0	0	0
2018-05-15	57	692	6	4	535	34.5	0.0130286	0	0	0	0
2018-05-15	58	693	6	4	595	34	0.0151384	1	3	3	9
2018-05-15	59	64	6	4	452	31.5	0.0144613	1	1	1	1
2018-05-15	60	695	6	4	419	30.5	0.0147678	0	0	0	0
2018-05-15	61	696	6	4	368	31	0.0123527	0	0	0	0
2018-05-15	62	697	6	4	482	31.5	0.0154211	1	1	1	1
2018-05-15	63	698	6	4	417	32	0.0127258	2	3	2	6
2018-05-15	99	734	12	4	481	32	0.014679	0	0	0	0
2018-05-15	100	735	12	4	680	36	0.0145748	0	0	0	0
2018-05-15	101	736	12	4	467	33	0.012995	0	0	0	0
2018-05-15	102	737	12	4	386	31	0.0129569	0	0	0	0
2018-05-15	103	738	12	4	431	31.5	0.0137894	0	0	0	0
2018-05-15	104	739	12	4	484	32	0.0147705	1	1	1	1
2018-05-15	105	740	12	4	442	31	0.0148367	0	0	0	0
															Diet1	Diet2	Diet6	Diet1H
														Number of values	7	7	7	7
														Minimum	0	0.5	0	0
														Maximum	2	1.5	2.667	2.333
														Range	2	1	2.667	2.333
														Mean	1	0.8571	1.214	0.9048	0.993975
														Std. Deviation	0.6939	0.378	1.066	0.7868	0.283622
														Std. Error of Mean	0.2623	0.1429	0.4029	0.2974

## Sheet: week 5
Date	Fish	sample ID	Tank	Diet	Mass	Length	Sampling	Overall gill score	total score	Gills Affected	Severity	Healthy Gills	Average	St Dev	Median
2018-05-22	1	748	1	1	573	33	6	0	0	0	0	16	0	0	0	1	1.1	0.8	1.3
2018-05-22	2	749	1	1	429	30	6	1	1	1	1	15	0.0625	0.25	0	0.2	0.4	0.4	1
2018-05-22	3	750	1	1	551	33	6	1	1	1	1	15	0.0625	0.25	0
2018-05-22	4	751	1	1	381	29.5	6	2	2	1	2	15	0.125	0.341565	0
2018-05-22	5	752	1	1	503	32	6	0	0	0	0	16	0	0	0
2018-05-22	6	753	1	1	350	28.5	6	2	2	1	2	15	0.125	0.5	0
2018-05-22	7	754	1	1	497	32	6	0	0	0	0	16	0	0	0
2018-05-22	8	755	1	1	430	31	6	1	1	1	1	15	0.0625	0.25	0
2018-05-22	9	756	1	1	386	28.5	6	2	2	1	2	15	0.125	0.5	0
2018-05-22	10	757	1	1	435	31	6	1	2	2	4	14	0.125	0.341565	0
2018-05-22	61	812	7	1	410	30.5	6	0	0	0	0	16	0	0	0
2018-05-22	62	813	7	1	566	34	6	0	0	0	0	16	0	0	0
2018-05-22	63	814	7	1	520	33	6	0	0	0	0	16	0	0	0
2018-05-22	64	815	7	1	400	31	6	0	0	0	0	16	0	0	0
2018-05-22	65	816	7	1	553	33.5	6	0	0	0	0	16	0	0	0
2018-05-22	66	817	7	1	483	33	6	0	0	0	0	16	0	0	0
2018-05-22	67	818	7	1	603	34	6	1	3	3	9	13	0.1875	0.403113	0
2018-05-22	68	819	7	1	384	30.5	6	1	1	1	1	15	0.0625	0.25	0
2018-05-22	69	820	7	1	525	33	6	0	0	0	0	16	0	0	0
2018-05-22	70	821	7	1	401	30.5	6	0	0	0	0	16	0	0	0
2018-05-22	21	770	3	2	463	31.5	6	1	0	1	0	15	0	0	0	0.2	0.3	0.4	0.9
2018-05-22	22	771	3	2	408	31	6	0	0	0	0	16	0	0	0	0.6	0.6	0.9	1.4
2018-05-22	23	772	3	2	404	31.5	6	0	0	0	0	16	0	0	0
2018-05-22	24	773	3	2	402	29.5	6	0	0	0	0	16	0	0	0
2018-05-22	25	774	3	2	518	33	6	0	0	0	0	16	0	0	0
2018-05-22	26	775	3	2	444	31	6	0	0	0	0	16	0	0	0
2018-05-22	27	776	3	2	531	33.5	6	1	3	3	9	13	0.1875	0.403113	0
2018-05-22	28	777	3	2	445	31	6	0	0	0	0	16	0	0	0
2018-05-22	29	778	3	2	541	33.5	6	0	0	0	0	16	0	0	0
2018-05-22	30	779	3	2			6	0	0	0	0	16	0	0	0
2018-05-22	41	790	5	2	606	35.5	6	1	0	1	0	15	0	0	0
2018-05-22	42	791	5	2	590	35	6	0	0	0	0	16	0	0	0
2018-05-22	43	792	5	2	425	30	6	2	4	3	12	13	0.25	0.57735	0
2018-05-22	44	793	5	2	531	32.5	6	0	0	0	0	16	0	0	0
2018-05-22	45	794	5	2	397	30.5	6	0	0	0	0	16	0	0	0
2018-05-22	46	795	5	2	577	34.5	6	1	1	1	1	15	0.0625	0.25	0
2018-05-22	47	796	5	2	464	31.5	6	1	1	1	1	15	0.0625	0.25	0
2018-05-22	48	797	5	2	556	34	6	0	0	0	0	16	0	0	0
2018-05-22	49	798	5	2	436	30.5	6	0	0	0	0	16	0	0	0
2018-05-22	50	799	5	2	451	31.5	6	1	0	3	0	13	0	0	0
2018-05-22	31	780	4	3	531	34	6	0	0	0	0	16	0	0	0	0.4	0.4	0.7	0.6
2018-05-22	32	781	4	3	432	31.5	6	1	1	1	1	15	0.0625	0.25	0	0.5	0.7	0.6	1.2
2018-05-22	33	782	4	3	525	32.5	6	0	0	0	0	16	0	0	0
2018-05-22	34	783	4	3	424	30.5	6	0	0	0	0	16	0	0	0
2018-05-22	35	784	4	3	409	29.5	6	0	0	0	0	16	0	0	0
2018-05-22	36	785	4	3	305	27	6	0	0	0	0	16	0	0	0
2018-05-22	37	786	4	3	395	34	6	1	2	2	4	14	0.125	0.341565	0
2018-05-22	38	787	4	3	387	29	6	1	1	1	1	15	0.0625	0.25	0
2018-05-22	39	788	4	3	357	29.5	6	0	0	0	0	16	0	0	0
2018-05-22	40	789	4	3	396	30.5	6	1	0	3	0	13	0	0	0
2018-05-22	71	823	8	3	382	29.5	6	0	0	0	0	16	0	0	0
2018-05-22	72	824	8	3	466	32	6	0	0	0	0	16	0	0	0
2018-05-22	73	825	8	3	235	28	6	1	2	2	4	14	0.125	0.341565	0
2018-05-22	74	826	8	3	241	26	6	0	0	0	0	16	0	0	0
2018-05-22	75	827	8	3	316	29	6	0	0	0	0	16	0	0	0
2018-05-22	76	828	8	3	468	32	6	1	1	1	1	15	0.0625	0.25	0
2018-05-22	77	829	8	3	369	30	6	0	0	0	0	16	0	0	0
2018-05-22	78	830	8	3	379	30.5	6	1	1	1	1	15	0.0625	0.25	0
2018-05-22	79	831	8	3	361	30	6	0	0	0	0	16	0	0	0
2018-05-22	11	758	2	4	508	33.5	6	2	3	2	6	14	0.1875	0.543906	0	0.8	1.3	1.2	3
2018-05-22	12	759	2	4	514	31.5	6	1	2	2	4	14	0.125	0.341565	0	0.6	0.8	0.7	1.3
2018-05-22	13	760	2	4	409	31.5	6	1	1	1	1	15	0.0625	0.25	0
2018-05-22	14	761	2	4	374	29	6	0	0	0	0	16	0	0	0
2018-05-22	15	762	2	4	241	26.5	6	1	1	1	1	15	0.0625	0.25	0
2018-05-22	16	763	2	4	523	33.5	6	1	1	1	1	15	0.0625	0.25	0
2018-05-22	17	764	2	4	425	31	6	0	0	0	0	16	0	0	0
2018-05-22	18	765	2	4	476	31.5	6	0	0	0	0	16	0	0	0
2018-05-22	19	766	2	4	467	33	6	1	4	4	16	12	0.25	0.447214	0
2018-05-22	20	767	2	4	564	33.5	6	1	1	1	1	15	0.0625	0.25	0
2018-05-22	51	801	6	4	503	33.5	6	0	0	0	0	16	0	0	0
2018-05-22	52	802	6	4	522	33.5	6	1	1	1	1	15	0.0625	0.25	0
2018-05-22	53	803	6	4	491	33.5	6	0	0	0	0	16	0	0	0
2018-05-22	54	804	6	4	438	31.5	6	2	3	2	6	14	0.1875	0.543906	0
2018-05-22	55	805	6	4	499	33	6	1	1	1	1	15	0.0625	0.25	0
2018-05-22	56	806	6	4	397	31	6	0	0	0	0	16	0	0	0
2018-05-22	57	807	6	4	543	34	6	1	2	2	4	14	0.125	0.341565	0
2018-05-22	58	808	6	4	431	31.5	6	0	0	0	0	16	0	0	0
2018-05-22	59	809	6	4	398	30.5	6	0	0	0	0	16	0	0	0
2018-05-22	60	810	6	4	373	30.5	6	1	1	1	1	15	0.0625	0.25	0
																		Diet1	Diet2	Diet6	Diet1H
																	Number of values	10	10	10	10
																	Minimum	0	0	0	0
																	Maximum	1.5	2	1	2
																	Range	1.5	2	1	2
																	Mean	0.75	0.45	0.4	1.05	0.6625
																	Std. Deviation	0.4859	0.8317	0.4595	0.5986	0.169606
																	Std. Error of Mean	0.1537	0.263	0.1453	0.1893

## Sheet: control gorup
						0 DPC								Average	overall average
Date	Fish	sample ID	Tank	Diet		Overall gill score	total score	Gills Affected	Severity	Healthy Gills	Average	St Dev	Median	0	0.15625
2018-04-16	1	1	14	2	0 dpc	0	0	0	0	16	0	0	0	0.25	0.447889
2018-04-16	2	2	14	2	0 dpc	0	0	0	0	16	0	0	0	0.25
2018-04-16	3	3	14	2	0 dpc	0	0	0	0	16	0	0	0	0.125
2018-04-16	4	4	14	2	0 dpc	0	0	0	0	16	0	0	0
2018-04-16	5	5	14	2	0 dpc	0	0	0	0	16	0	0	0
2018-04-16	6	6	14	2	0 dpc	0	0	0	0	16	0	0	0
2018-04-16	7	7	14	2	0 dpc	0	0	0	0	16	0	0	0
2018-04-16	8	8	14	2	0 dpc	0	0	0	0	16	0	0	0
2018-04-16	1	9	15	4	0 dpc	1	0	0	0	16	0.0625	0.25	0
2018-04-16	2	10	15	4	0 dpc	0	0	0	0	16	0	0	0
2018-04-16	3	11	15	4	0 dpc	0	0	0	0	16	0	0	0
2018-04-16	4	12	15	4	0 dpc	0	0	0	0	16	0	0	0
2018-04-16	5	13	15	4	0 dpc	0	0	0	0	16	0	0	0
2018-04-16	6	14	15	4	0 dpc	0	0	0	0	16	0	0	0
2018-04-16	7	15	15	4	0 dpc	1	3	3	9	13	0.1875	0.403113	0
2018-04-16	8	16	15	4	0 dpc	0	0	0	0	16	0	0	0
2018-04-16	1	17	16	3	0 dpc	0	0	0	0	16	0	0	0
2018-04-16	2	18	16	3	0 dpc	0	0	1	0	15	0	0	0
2018-04-16	3	19	16	3	0 dpc	0	0	1	0	15	0	0	0
2018-04-16	4	20	16	3	0 dpc	0	0	2	0	14	0	0	0
2018-04-16	5	21	16	3	0 dpc	2	3	2	6	14	0.1875	0.543906	0
2018-04-16	6	22	16	3	0 dpc	0	0	0	0	16	0	0	0
2018-04-16	7	23	16	3	0 dpc	0	0	0	0	16	0	0	0
2018-04-16	8	24	16	3	0 dpc	0	0	0	0	16	0	0	0
2018-04-16	1	25	1	1	0 dpc	0	0	0	0	16	0	0	0
2018-04-16	2	26	1	1	0 dpc	0	0	0	0	16	0	0	0
2018-04-16	3	27	1	1	0 dpc	0	0	0	0	16	0	0	0
2018-04-16	4	28	1	1	0 dpc	0	0	0	0	16	0	0	0
2018-04-16	5	29	1	1	0 dpc	0	0	0	0	16	0	0	0
2018-04-16	6	30	1	1	0 dpc	0	0	0	0	16	0	0	0
2018-04-16	7	31	1	1	0 dpc	1	0	0	0	16	0.0625	0.25	0
2018-04-16	8	32	1	1	0 dpc	0	0	0	0	16	0	0	0
2018-04-24	1	129	14	2	7 dpc	1	4	4	16	12	0.25	0.447214	0	0.5	0.425
2018-04-24	2	130	14	2	7 dpc	1	1	1	1	15	0.0625	0.25	0	0.5	0.635993
2018-04-24	3	131	14	2	7 dpc	0	0	0	0	16	0	0	0	0.4
2018-04-24	4	132	14	2	7 dpc	0	0	0	0	16	0	0	0	0.3
2018-04-24	5	133	14	2	7 dpc	0	0	0	0	16	0	0	0
2018-04-24	6	134	14	2	7 dpc	0	0	0	0	16	0	0	0
2018-04-24	7	135	14	2	7 dpc	1	1	1	1	15	0.0625	0.25	0
2018-04-24	8	136	14	2	7 dpc	2	3	2	6	14	0.1875	0.543906	0
2018-04-24	9	137	14	2	7 dpc	0	0	0	0	16	0	0	0
2018-04-24	10	138	14	2	7 dpc	0	0	0	0	16	0	0	0
2018-04-24	1	139	15	4	7 dpc	0	0	0	0	16	0	0	0
2018-04-24	2	140	15	4	7 dpc	0	0	0	0	16	0	0	0
2018-04-24	3	141	15	4	7 dpc	1	1	1	1	15	0.0625	0.25	0
2018-04-24	4	142	15	4	7 dpc	0	0	0	0	16	0	0	0
2018-04-24	5	143	15	4	7 dpc	1	1	1	1	15	0.125	0.341565	0
2018-04-24	6	144	15	4	7 dpc	0	0	0	0	16	0	0	0
2018-04-24	7	145	15	4	7 dpc	0	0	0	0	16	0	0	0
2018-04-24	8	146	15	4	7 dpc	1	1	1	1	15	0.0625	0.25	0
2018-04-24	9	147	15	4	7 dpc	1	1	1	1	15	0.125	0.341565	0
2018-04-24	10	148	15	4	7 dpc	1	2	2	4	14	0.0625	0.25	0
2018-04-24	1	149	16	3	7 dpc	1	1	1	1	15	0.0625	0.25	0
2018-04-24	2	150	16	3	7 dpc	0	0	0	0	16	0	0	0
2018-04-24	3	151	16	3	7 dpc	0	0	0	0	16	0	0	0
2018-04-24	4	152	16	3	7 dpc	0	0	0	0	16	0	0	0
2018-04-24	5	153	16	3	7 dpc	0	0	0	0	16	0	0	0
2018-04-24	6	154	16	3	7 dpc	2	3	2	6	14	0.1875	0.543906	0
2018-04-24	7	154	16	3	7 dpc	0	0	0	0	16	0	0	0
2018-04-24	8	156	16	3	7 dpc	0	0	0	0	16	0	0	0
2018-04-24	9	157	16	3	7 dpc	1	1	1	1	15	0.0625	0.25	0
2018-04-24	10	158	16	3	7 dpc	0	0	0	0	16	0	0	0
2018-04-24	1	159	1	1	7 dpc	2	2	1	2	15	0.125	0.5	0
2018-04-24	2	160	1	1	7 dpc	0	0	0	0	16	0	0	0
2018-04-24	3	161	1	1	7 dpc	0	0	0	0	16	0	0	0
2018-04-24	4	162	1	1	7 dpc	1	1	1	1	15	0.0625	0.25	0
2018-04-24	5	163	1	1	7 dpc	0	0	0	0	16	0	0	0
2018-04-24	6	164	1	1	7 dpc	0	0	0	0	16	0	0	0
2018-04-24	7	165	1	1	7 dpc	0	0	0	0	16	0	0	0
2018-04-24	8	166	1	1	7 dpc	0	0	0	0	16	0	0	0
2018-04-24	9	167	1	1	7 dpc	0	0	0	0	16	0	0	0
2018-04-24	10	168	1	1	7 dpc	0	0	0	0	16	0	0	0
2018-05-03	1	289	14	2	14 dpc	0	0	0	0	16	0	0	0	0.2	0.375
2018-05-02	2	290	14	2	14 dpc	0	0	0	0	16	0	0	0	0.4	0.704837
2018-05-02	3	291	14	2	14 dpc	0	0	0	0	16	0	0	0	0.5
2018-05-02	4	292	14	2	14 dpc	0	0	0	0	16	0	0	0	0.4
2018-05-02	5	293	14	2	14 dpc	0	0	0	0	16	0	0	0
2018-05-02	6	294	14	2	14 dpc	0	0	0	0	16	0	0	0
2018-05-02	7	295	14	2	14 dpc	2	3	2	6	14	0.1875	0.543906	0
2018-05-02	8	296	14	2	14 dpc	0	0	0	0	16	0	0	0
2018-05-02	9	297	14	2	14 dpc	0	0	0	0	16	0.0625	0.25	0
2018-05-02	10	298	14	2	14 dpc	0	0	0	0	16	0	0	0
2018-05-02	1	299	15	4	14 dpc	0	0	0	0	16	0	0	0
2018-05-02	2	300	15	4	14 dpc	0	0	0	0	16	0	0	0
2018-05-02	3	301	15	4	14 dpc	0	0	0	0	16	0.0625	0.25	0
2018-05-02	4	302	15	4	14 dpc	1	1	1	1	15	0.0625	0.25	0
2018-05-02	5	303	15	4	14 dpc	1	1	1	1	15	0.0625	0.25	0
2018-05-02	6	304	15	4	14 dpc	0	0	0	0	16	0	0	0
2018-05-02	7	305	15	4	14 dpc	0	0	0	0	16	0	0	0
2018-05-02	8	306	15	4	14 dpc	0	0	0	0	16	0	0	0
2018-05-02	9	307	15	4	14 dpc	0	0	0	0	16	0	0	0
2018-05-02	10	308	15	4	14 dpc	2	3	2	6	14	0.1875	0.543906	0
2018-05-02	1	309	16	3	14 dpc	0	0	0	0	16	0	0	0
2018-05-02	2	310	16	3	14 dpc	1	1	1	1	15	0.0625	0.25	0
2018-05-02	3	311	16	3	14 dpc	2	3	2	6	14	0.1875	0.543906	0
2018-05-02	4	312	16	3	14 dpc	0	0	0	0	16	0	0	0
2018-05-02	5	313	16	3	14 dpc	1	1	1	1	15	0.0625	0.25	0
2018-05-02	6	314	16	3	14 dpc	0	0	0	0	16	0	0	0
2018-05-02	7	315	16	3	14 dpc	0	0	0	0	16	0	0	0
2018-05-02	8	316	16	3	14 dpc	0	0	0	0	16	0	0	0
2018-05-02	9	317	16	3	14 dpc	0	0	0	0	16	0	0	0
2018-05-02	10	318	16	3	14 dpc	1	1	1	1	15	0.0625	0.25	0
2018-05-02	1	319	1	1	14 dpc	0	0	0	0	16	0	0	0
2018-05-02	2	320	1	1	14 dpc	2	2	1	2	15	0.125	0.5	0
2018-05-02	3	321	1	1	14 dpc	2	2	1	2	15	0.125	0.5	0
2018-05-02	4	322	1	1	14 dpc	0	0	0	0	16	0	0	0
2018-05-02	5	323	1	1	14 dpc	0	0	0	0	16	0	0	0
2018-05-02	6	324	1	1	14 dpc	0	0	0	0	16	0	0	0
2018-05-02	7	325	1	1	14 dpc	0	0	0	0	16	0	0	0
2018-05-02	8	326	1	1	14 dpc	0	0	0	0	16	0	0	0
2018-05-02	9	327	1	1	14 dpc	0	0	0	0	16	0	0	0
2018-05-02	10	328	1	1	14 dpc	0	0	0	0	16	0	0	0
2018-05-08	1	449	14	2	21 dpc	0	0	0	0	16	0	0	0	0.4	0.5
2018-05-08	2	450	14	2	21 dpc	0	0	0	0	16	0	0	0	0.4	0.784465
2018-05-08	3	451	14	2	21 dpc	0	0	0	0	16	0	0	0	0.7
2018-05-08	4	452	14	2	21 dpc	0	0	0	0	16	0	0	0	0.5
2018-05-08	5	453	14	2	21 dpc	0	0	0	0	16	0	0	0
2018-05-08	6	454	14	2	21 dpc	0	0	0	0	16	0	0	0
2018-05-08	7	455	14	2	21 dpc	0	0	0	0	16	0	0	0
2018-05-08	8	456	14	2	21 dpc	1	1	1	1	15	0.0625	0.25	0
2018-05-08	9	457	14	2	21 dpc	1	1	1	1	15	0.0625	0.25	0
2018-05-08	10	458	14	2	21 dpc	2	3	2	6	14	0.1875	0.543906	0
2018-05-08	1	459	15	4	21 dpc	0	0	0	0	16	0	0	0
2018-05-08	2	460	15	4	21 dpc	0	0	0	0	16	0	0	0
2018-05-08	3	461	15	4	21 dpc	0	0	0	0	16	0	0	0
2018-05-08	4	462	15	4	21 dpc	2	3	2	6	14	0.1875	0.543906	0
2018-05-08	5	463	15	4	21 dpc	1	1	1	1	15	0.0625	0.25	0
2018-05-08	6	464	15	4	21 dpc	0	0	0	0	16	0	0	0
2018-05-08	7	465	15	4	21 dpc	0	0	0	0	16	0	0	0
2018-05-08	8	466	15	4	21 dpc	1	2	2	4	14	0.125	0.341565	0
2018-05-08	9	467	15	4	21 dpc	0	0	0	0	16	0	0	0
2018-05-08	10	468	15	4	21 dpc	0	0	0	0	16	0	0	0
2018-05-08	1	469	16	3	21 dpc	0	0	0	0	16	0	0	0
2018-05-08	2	470	16	3	21 dpc	0	0	0	0	16	0	0	0
2018-05-08	3	471	16	3	21 dpc	0	0	0	0	16	0	0	0
2018-05-08	4	472	16	3	21 dpc	0	0	0	0	16	0	0	0
2018-05-08	5	473	16	3	21 dpc	0	0	0	0	16	0.1875	0.403113	0
2018-05-08	6	474	16	3	21 dpc	1	3	3	9	13	0	0	0
2018-05-08	7	475	16	3	21 dpc	0	0	0	0	16	0	0	0
2018-05-08	8	476	16	3	21 dpc	1	1	1	1	15	0.0625	0.25	0
2018-05-08	9	477	16	3	21 dpc	3	3	1	3	15	0.1875	0.75	0
2018-05-08	10	478	16	3	21 dpc	2	2	1	2	15	0.125	0.5	0
2018-05-08	1	479	1	1	21 dpc	1	1	1	1	15	0.0625	0.25	0
2018-05-08	2	480	1	1	21 dpc	0	0	0	0	16	0	0	0
2018-05-08	3	481	1	1	21 dpc	2	2	1	2	15	0.125	0.5	0
2018-05-08	4	482	1	1	21 dpc	1	1	1	1	15	0.0625	0.25	0
2018-05-08	5	483	1	1	21 dpc	0	0	0	0	16	0	0	0
2018-05-08	6	484	1	1	21 dpc	0	0	0	0	16	0	0	0
2018-05-08	7	485	1	1	21 dpc	0	0	0	0	16	0	0	0
2018-05-08	8	486	1	1	21 dpc	1	1	1	1	15	0.0625	0.25	0
2018-05-08	9	487	1	1	21 dpc	0	0	0	0	16	0	0	0
2018-05-08	10	488	1	1	21 dpc	0	0	0	0	16	0	0	0
2018-05-15	1	609	14	2	28 dpc	0	0	0	0	16	0	0	0	0.0714286	0.092033
2018-05-15	2	610	14	2	28 dpc	0	0	0	0	16	0	0	0	0.0714286	0.290129
2018-05-15	3	611	14	2	28 dpc	0	0	0	0	16	0	0	0	0.0714286
2018-05-15	4	612	14	2	28 dpc	0	0	0	0	16	0	0	0	0.153846
2018-05-15	5	613	14	2	28 dpc	0	0	0	0	16	0	0	0
2018-05-15	6	614	14	2	28 dpc	0	0	0	0	16	0	0	0
2018-05-15	7	615	14	2	28 dpc	0	0	0	0	16	0	0	0
2018-05-15		616	14	2	28 dpc	0	0	0	0	16	0	0	0
2018-05-15		617	14	2	28 dpc	0	0	0	0	16	0	0	0
2018-05-15		618	14	2	28 dpc	0	0	0	0	16	0	0	0
2018-05-15		619	14	2	28 dpc	0	0	0	0	16	0	0	0
2018-05-15		620	14	2	28 dpc	0	0	0	0	16	0	0	0
2018-05-15		621	14	2	28 dpc	0	0	0	0	16	0	0	0
2018-05-15		622	14	2	28 dpc	1	3	2	6	14	0.1875	0.543906	0
2018-05-15	8	623	15	4	28 dpc	0	0	0	0	16	0	0	0
2018-05-15	9	624	15	4	28 dpc	0	0	0	0	16	0	0	0
2018-05-15	10	625	15	4	28 dpc	0	0	0	0	16	0	0	0
2018-05-15	11	626	15	4	28 dpc	0	0	0	0	16	0	0	0
2018-05-15	12	627	15	4	28 dpc	1	1	1	1	15	0.0625	0.25	0
2018-05-15	13	628	15	4	28 dpc	0	0	0	0	16	0	0	0
2018-05-15	14	629	15	4	28 dpc	0	0	0	0	16	0	0	0
2018-05-15		630	15	4	28 dpc	0	0	0	0	16	0	0	0
2018-05-15		631	15	4	28 dpc	0	0	0	0	16	0	0	0
2018-05-15		632	15	4	28 dpc	0	0	0	0	16	0	0	0
2018-05-15		633	15	4	28 dpc	0	0	0	0	16	0	0	0
2018-05-15		634	15	4	28 dpc	0	0	0	0	16	0	0	0
2018-05-15		635	15	4	28 dpc	0	0	0	0	16	0	0	0
2018-05-15		636	15	3	28 dpc	0	0	0	0	16	0	0	0
2018-05-15	15	637	16	3	28 dpc	0	0	0	0	16	0	0	0
2018-05-15	16	638	16	3	28 dpc	0	0	0	0	16	0	0	0
2018-05-15	17	639	16	3	28 dpc	0	0	0	0	16	0	0	0
2018-05-15	18	640	16	3	28 dpc	0	0	0	0	16	0	0	0
2018-05-15	19	641	16	3	28 dpc	0	0	0	0	16	0	0	0
2018-05-15	20	642	16	3	28 dpc	0	0	0	0	16	0	0	0
2018-05-15	21	643	16	3	28 dpc	0	0	0	0	16	0	0	0
2018-05-15		644	16	3	28 dpc	0	0	0	0	16	0	0	0
2018-05-15		645	16	3	28 dpc	0	0	0	0	16	0	0	0
2018-05-15		646	16	3	28 dpc	0	0	0	0	16	0	0	0
2018-05-15		647	16	3	28 dpc	1	1	1	1	15	0.0625	0.25	0
2018-05-15		648	16	3	28 dpc	0	0	0	0	16	0	0	0
2018-05-15		649	16	3	28 dpc	0	0	0	0	16	0	0	0
2018-05-15		650	16	3	28 dpc	0	0	0	0	16	0	0	0
2018-05-15	22	651	1	1	28 dpc	1	1	1	1	15	0.0625	0.25	0
2018-05-15	23	652	1	1	28 dpc	0	0	0	0	16	0	0	0
2018-05-15	24	653	1	1	28 dpc	0	0	0	0	16	0	0	0
2018-05-15	25	654	1	1	28 dpc	0	0	0	0	16	0	0	0
2018-05-15	26	655	1	1	28 dpc	0	0	0	0	16	0	0	0
2018-05-15	27	656	1	1	28 dpc	0	0	0	0	16	0	0	0
2018-05-15	28	657	1	1	28 dpc	1	1	1	1	15	0.0625	0.25	0
2018-05-15		658	1	1	28 dpc	0	0	0	0	16	0	0	0
2018-05-15		659	1	1	28 dpc	0	0	0	0	16	0	0	0
2018-05-15		660	1	1	28 dpc	0	0	0	0	16	0	0	0
2018-05-15		661	1	1	28 dpc	0	0	0	0	16	0	0	0
2018-05-15		662	1	1	28 dpc	0	0	0	0	16	0	0	0
2018-05-15		663	1	1	28 dpc	0	0	0	0	16	0	0	0
